# Supplementary material
Source: publisher site journal article supplement (https://www.dovepress.com/get_supplementary_file.php?f=supplementary_file_40841.pdf)
Supplement: Supplementary file 1 [file get_supplementary_file.php]

Supplementary materials

Table S1: Sociodemographic correlates of eating disorder epidemiology

| Study                                                                 | Wave               | N    | RR (%) | Population                                                                                           | Year Data Collected | ED Diagnosis                                      | Country         | Age   | % female | Design          | Prevalence                                                                                           | Correlates                                                                                              | Findings                                                                                                                                                                                                                                                                                                                                                                                                        |
|-----------------------------------------------------------------------|--------------------|------|--------|------------------------------------------------------------------------------------------------------|---------------------|---------------------------------------------------|-----------------|-------|----------|-----------------|------------------------------------------------------------------------------------------------------|---------------------------------------------------------------------------------------------------------|-----------------------------------------------------------------------------------------------------------------------------------------------------------------------------------------------------------------------------------------------------------------------------------------------------------------------------------------------------------------------------------------------------------------|
| National Latino and Asian American Study [1-3]                        | Baseline           | 2554 | 75.5   | Adult Latino and Asian Americans living in the USA                                                   | 2002-3              | Interview: WMH-CIDI                               | USA             | > 18  | 56       | Cross-sectional | Lifetime: 0.08% AN, 1.61% BN, 1.92% BED<br>12mo: 0.03% AN, 0.82% BN, 0.90% BED                       | sex, age, education, nativity (USA/Other), parents born overseas, time spent in USA, sexual orientation | Effects:<br>Female sex (lifetime BN, BED; 12mo BN, BED); lower education (lifetime BED); age < 30 years (lifetime BN, BED); more time in USA (lifetime BN).<br><br>Null effects:<br>Education (lifetime BN); age (lifetime BED, BN); time in USA (lifetime BED; 12mo BN, BED); nativity (12mo BN, BED), parents born overseas (lifetime BN, BED; 12mo BN, BED); sexual orientation (lifetime AN/BN; 12mo AN/BN) |
| Western Australian Pregnancy Cohort (Raine) Study [4]                 | 14 year follow-up  | 1597 | 56     | Participants of the Raine Study: born at a public hospital 1989-91                                   | 2004 (est.)         | Interview: ChEDE                                  | Australia       | 13-15 | 45       | Longitudinal    | Current: 0.06% AN, 0.56% BN, 0.44% BED, 1.7% PD                                                      | sex, paternal age                                                                                       | Effects:<br>Female sex (current EDs); higher paternal age at birth (current EDs).<br><br>Null effects:<br>n/a                                                                                                                                                                                                                                                                                                   |
| [5]                                                                   | 2 year follow-up   | 1076 | 61     | Students originally recruited in their 2nd year of high school from 22 schools in Ciudad Real, Spain | 2000-1              | Interview: SCAN for ICD-10, DSM-IV, and DSM-III-R | Spain           | 14-16 | 46       | Longitudinal    | Current: 0.1% AN, 0.75% BN, 2.60% EDNOS                                                              | sex                                                                                                     | Effects:<br>Female sex (current EDs).<br><br>Null effects:<br>n/a                                                                                                                                                                                                                                                                                                                                               |
| Netherlands Mental Health Survey and Incidence Study (NEMESIS) [6, 7] | Baseline           | 7076 | 69.7   | Household representative sample of the adult Netherlands population                                  | 1996                | Interview: CIDI for DSM-III-R                     | The Netherlands | 18-64 | 53.3     | Cross-sectional | Lifetime: 0.7% ED, 1.0% AN, 0.6% BN<br>12mo: 0.4% ED, 0% AN, 0.4% BN<br>1mo: 0.3% ED, 0% AN, 0.3% BN | sex                                                                                                     | Effects:<br>n/a<br><br>Null effects:<br>Sex (1mo, 12mo, lifetime: EDs, AN, BN).                                                                                                                                                                                                                                                                                                                                 |
|                                                                       | 12-month follow-up | 5618 | 79.4   |                                                                                                      | 1997                |                                                   |                 | 19-65 | 53.5     | Longitudinal    | 12mo incidence: 0.19% ED                                                                             | sex, age                                                                                                | Effects:<br>Age 25-44 (12mo ED incidence – men); age 18-34 (12mo ED incidence - women)<br><br>Null effects:<br>Sex (12-mo ED incidence)                                                                                                                                                                                                                                                                         |

|      |                  |       |      |                                                                                                                                                     |           |                                                              |        |              |     |                 |                                                                                                                                            |                                                                                            |                                                                                                                                                         |
|------|------------------|-------|------|-----------------------------------------------------------------------------------------------------------------------------------------------------|-----------|--------------------------------------------------------------|--------|--------------|-----|-----------------|--------------------------------------------------------------------------------------------------------------------------------------------|--------------------------------------------------------------------------------------------|---------------------------------------------------------------------------------------------------------------------------------------------------------|
| [8]  | Follow-up        | 31406 | 75.7 | Twins on the Swedish twin registry born 1935-58                                                                                                     | 1998-2002 | Interview: SCID for DSM-IV                                   | Sweden | 40-67 (est.) | 51  | Cross-sectional | Lifetime: 0.36% AN, 0.64% broad AN                                                                                                         | Age, education                                                                             | Effects:<br>Younger age (AN, broad AN); higher education (AN, broad AN)<br><br>Null effects:<br>n/a                                                     |
| [9]  | Baseline         | 188   | n/a  | Women responding to newspaper ads and flyers (50% with a focus on EDs) in stores and organizations in Mexican American LA communities               | NR        | Interview: SCID for DSM-IV-TR                                | USA    | 18-48        | 100 | Cross-sectional | Current: 0.02% AN, 13.8% BN, 15.4% BED, 11.2% EDNOS                                                                                        | Age, SES, immigration generation status, Anglo orientation                                 | Effects:<br>Older age (EDs); greater Anglo orientation (EDs).<br><br>Null effects:<br>SES (EDs), immigration generation status (EDs).                   |
| [10] | Baseline         | 236   | n/a  | Women responding to newspaper ads and flyers in stores and organizations in LA identified as 'eating disordered' and age/education matched controls | NR        | Interview: questions from the EDE to identify 'probable EDs' | USA    | 18-44        | 100 | Cross-sectional | n/a                                                                                                                                        | Ethnicity (Hispanic, Black, White, Asian), age, education, parental immigration, languages | Effects:<br>Monolingual (EDs); mother born in USA (EDs); father born in USA (EDs).<br><br>Null effects:<br>Ethnicity (ED type); age or education (EDs). |
| [11] | 8-year follow-up | 290   | 50.9 | 18 year-old participants in a longitudinal cohort attending local high schools and technical schools in Reus, Spain                                 | 1995      | Interview: SCAN for ICD-10 and DSM-III-R                     | Spain  | 17.5-18.5    | 52  | Cross-sectional | Current: 1.4% ICD-10 AN, 0.3% DSM-III-R AN, 0.7% ICD-10 BN, 0.3% DSM-III-R BN, 0.7% ICD-10 menstruating AN, 0.7% DSM-III-R menstruating AN | Education, parental occupation, parental qualifications                                    | Effects:<br>n/a<br><br>Null effects:<br>Education, parental occupation, or parental qualifications (EDs)                                                |

|      |                  |      |      |                                                                                                                                                                       |        |                                           |       |                 |      |                 |                                                                                                                                                     |                                                                                            |                                                                                                                                                                                                                                                                                                                                                                  |
|------|------------------|------|------|-----------------------------------------------------------------------------------------------------------------------------------------------------------------------|--------|-------------------------------------------|-------|-----------------|------|-----------------|-----------------------------------------------------------------------------------------------------------------------------------------------------|--------------------------------------------------------------------------------------------|------------------------------------------------------------------------------------------------------------------------------------------------------------------------------------------------------------------------------------------------------------------------------------------------------------------------------------------------------------------|
| [12] | 2-year follow-up | 200  | 77.5 | Adolescent participants selected as 'eating disordered' and controls in a longitudinal cohort recruited from 17 randomly selected primary schools in Tarragona, Spain | NR     | Interview: DICA-R for DSM-IV              | Spain | 13-15           | 53.5 | Cross-sectional | n/a                                                                                                                                                 | sex                                                                                        | Effects:<br>Female sex (current EDs).<br><br>Null effects:<br>n/a                                                                                                                                                                                                                                                                                                |
| [13] | Baseline         | 2103 | 91.8 | Students from middle schools, high schools, and colleges/universities from North, South, Central, and Southwest China                                                 | 2005   | Questionnaire: EDDS for ICD-10 and DSM-IV | China | 12-22           | 62.8 | Cross-sectional | Current: 0.0% AN, 1.1% subclinical AN, 0.3% BN, 0.3% subclinical BN, 0.4% BED                                                                       | sex, age, SES                                                                              | Effects:<br>Female sex (current BN, subclinical BN, BED); age 12-15 (current subclinical AN); age 16-18 (current BN); higher SES (current subclinical AN, subclinical BN).<br><br>Null effects:<br>Sex (current subclinical AN); age (current subclinical BN, BED); SES (current BN, BED).                                                                       |
| [14] | Baseline         | 2992 | 58.8 | Young women on GP registry who responded to an ED survey and were identified as 'dieters' but without an ED history                                                   | NR     | Interview: EDE                            | UK    | 16-23           | 100  | Longitudinal    | 2-year incidence: 0.3% AN; 0.64% BN; 2.5% EDNOS                                                                                                     | Age                                                                                        | Effects:<br>n/a<br><br>Null effects:<br>Age (EDs).                                                                                                                                                                                                                                                                                                               |
|      | 6mo follow-up    | 2274 | 76   |                                                                                                                                                                       | NR     |                                           |       |                 |      |                 |                                                                                                                                                     |                                                                                            |                                                                                                                                                                                                                                                                                                                                                                  |
|      | 12mo follow-up   | 1559 | 68   |                                                                                                                                                                       | NR     |                                           |       |                 |      |                 |                                                                                                                                                     |                                                                                            |                                                                                                                                                                                                                                                                                                                                                                  |
|      | 18mo follow-up   | 1885 | 63   |                                                                                                                                                                       | NR     |                                           |       |                 |      |                 |                                                                                                                                                     |                                                                                            |                                                                                                                                                                                                                                                                                                                                                                  |
|      | 2-year follow-up | 1795 | 60   |                                                                                                                                                                       | NR     |                                           |       |                 |      |                 |                                                                                                                                                     |                                                                                            |                                                                                                                                                                                                                                                                                                                                                                  |
| [15] | Baseline         | 934  | 78   | Females aged 18-25 on the electoral registers of two areas of Padova, Italy                                                                                           | NR     | Interview: SCID for DSM-IV                | Italy | 18-25           | 100  | Cross-sectional | Current: 0.3% AN, 1.8% BN, 0.1% BED, 0.7% atypical AN, 2.4% atypical BN<br>Lifetime: 2.0% AN, 4.6% BN, 0.6% BED, 2.6% atypical AN, 3.1% atypical BN | Urbanicity, education, marital status, occupational status, social class, menarche timing  | Effects:<br>Urban residency (lifetime AN, BN, BED, EDs); not being employed (lifetime AN).<br><br>Null effects:<br>Urbanicity (lifetime atypical AN, atypical BN), education (lifetime AN, BN, EDs); marital status (lifetime AN, BN, EDs); occupational status (lifetime BN, EDs); social class (lifetime AN, BN, EDs); menarche timing (lifetime AN, BN, EDs); |
| [16] | Baseline         | 516  | n/a  | Lesbian, bisexual, gay (LGB) and straight responders to advertisements in diverse                                                                                     | 2004-5 | Interview: CIDI for DSM-IV                | USA   | M = 32 (SD = 9) | 50   | Cross-sectional | Lifetime:<br>Gay/bisexual men: 1.0% AN, 6.2% BN, 5.2% BED, 3.1% subclinical AN,                                                                     | Sexual orientation (within sex), sex, ethnicity (White, Black, Latino), age (within sexual | Effects:<br>LGB (male: lifetime BN, subclinical BN); age < 30 (lifetime subclinical BN).<br><br>Null effects:<br>Sexual orientation (female: lifetime EDs, AN, BN, BED, subclinical AN, subclinical BN, subclinical                                                                                                                                              |

|                                |           |       |      |                                                                                                                   |        |                                          |                 |       |    |                 |                                                                                                                                                             |                                                                                                  |                                                                                                                                                                                                                                                                                                                                                                                             |
|--------------------------------|-----------|-------|------|-------------------------------------------------------------------------------------------------------------------|--------|------------------------------------------|-----------------|-------|----|-----------------|-------------------------------------------------------------------------------------------------------------------------------------------------------------|--------------------------------------------------------------------------------------------------|---------------------------------------------------------------------------------------------------------------------------------------------------------------------------------------------------------------------------------------------------------------------------------------------------------------------------------------------------------------------------------------------|
|                                |           |       |      | communities of New York City                                                                                      |        |                                          |                 |       |    |                 | 9.3% subclinical BN, 9.3% subclinical BED<br>Lesbian/bisexual women: 0% AN, 4.6% BN, 4.6% BED, 0% subclinical AN, 5.6% subclinical BN, 6.2% subclinical BED | orientation)                                                                                     | BED; male: lifetime EDs, AN, BED, subclinical AN, subclinical BED); sex, ethnicity, or sexual orientation (LGB: lifetime EDs, AN, BN, BED, subclinical AN, subclinical BN, subclinical BED); age (LGB: lifetime EDs, AN, BN, BED, subclinical AN, subclinical BED).                                                                                                                         |
| [17]                           | Baseline  | 1545  | 97.5 | Students in Madrid in 20 randomly selected Secondary Obligatory Education, high school, and university institutes | 2001-2 | Interview: EDE for DSM-IV                | Spain           | 12-21 | 59 | Cross-sectional | Current: 0.19% AN, 1.42% BN, 1.81% EDNOS                                                                                                                    | Sex, age, education level, number of siblings, parental occupation, living situation, urbanicity | Effects:<br>Female sex (current EDs); age 12-19 (current EDs); living with single parent (current EDs); only child (current EDs).<br><br>Null effects:<br>Education (current EDs); parental occupation (current EDs); urbanicity (current EDs)                                                                                                                                              |
| [18]                           | Baseline  | 3801  | 90.0 | Greek school girls from (1) Munich, Germany, (2) Veria, Greece                                                    | 1998   | Interview: SIAB-EX for DSM-IV            | Germany, Greece | 10-26 | 51 | Cross-sectional | Current: 0.23% AN, 0.94% BN, 0.48% subclinical BN<br>Lifetime: 0.61% AN, 2.02% BN, 0.95% subclinical BN                                                     | Migration, sex (within migration)                                                                | Effects:<br>Not being a migrant (current and lifetime subclinical BN); female sex (migrants: current and lifetime BN, lifetime AN; non-migrants: current and lifetime AN, lifetime BN, lifetime subclinical BN).<br><br>Null effects:<br>Migration (current and lifetime AN, BN); sex (migrants: current AN, current and lifetime subclinical BN; non-migrants: current BN, subclinical BN) |
| [19]                           | Follow-up | 16728 | 60.1 | Twins on the Swedish twin registry born 1959-85 and living in Sweden                                              | 2005-6 | Interview: SCID for DSM-IV               | Sweden          | 20-47 | 60 | Cross-sectional | Lifetime:<br>Gay men: 1.1% ED<br>Lesbian women: 10.3% ED                                                                                                    | Sexual orientation                                                                               | Effects:<br>Same-sex orientation (lifetime EDs).<br><br>Null effects:<br>n/a                                                                                                                                                                                                                                                                                                                |
| Ontario Health Survey [20, 21] | Baseline  | 8116  | 76.5 | Adults residing in households in Ontario, Canada                                                                  | 1990-1 | Interview: CIDI for DSM-III-R and ICD-10 | Canada          | 15-64 | 53 | Cross-sectional | Current: 0.76% BN (0.21% BN-P, 0.55% BN-NP), 0.34% subclinical BN                                                                                           | Age                                                                                              | Effects:<br>n/a<br><br>Null effects:<br>Age (current EDs)                                                                                                                                                                                                                                                                                                                                   |

|                                                               |                  |      |      |                                                                                                                                                     |        |                                                                          |           |                      |     |                 |                                                                                                            |                                                                                       |                                                                                                                                           |
|---------------------------------------------------------------|------------------|------|------|-----------------------------------------------------------------------------------------------------------------------------------------------------|--------|--------------------------------------------------------------------------|-----------|----------------------|-----|-----------------|------------------------------------------------------------------------------------------------------------|---------------------------------------------------------------------------------------|-------------------------------------------------------------------------------------------------------------------------------------------|
| Body Satisfaction and Related Issues in Iran Study [22]       | Baseline         | 1181 | 98   | 14-55 year-olds residing in households in Kerman, Iran                                                                                              | NR     | Questionnaire: EDDS for DSM-IV                                           | Iran      | 14-55                | 54  | Cross-sectional | Current: 0.8% AN, 6.2% BN, 1.4% sub-threshold AN, 3.0% sub-threshold BED                                   | Education                                                                             | Effects: Lower education (EDs).<br>Null effects: n/a                                                                                      |
| [23]                                                          | Baseline         | 1157 | 59.3 | 18-30 year-old women in the Swedish general population                                                                                              | NR     | Questionnaire: SEDs modified by Gotestam & Agras for DSM-IV              | Sweden    | 18-30                | 100 | Cross-sectional | Current: 0.0% AN, 1.73% BN, 0.52% BED, 0.34% EDNOS<br>Past: 0.86% AN, 2.85% BN, 1.04% BED, 7.78% EDNOS     | Age, marital status, education, work status, county of residence, region of residence | Effects: n/a<br>Null effects: Age, marital status, education, work status, county of residence, region of residence (current or past EDs) |
| [24]                                                          | Baseline         | 1849 | 74.9 | Women in the Norwegian general population                                                                                                           | 1991   | Questionnaire: developed by authors for DSM-III-R EDs                    | Norway    | M = 37.1 (SD = 11.9) | 100 | Cross-sectional | Current: 0.27% AN, 0.7% BN, 1.46% BED, 1.30% EDNOS<br>Lifetime: 0.43% AN, 1.62% BN, 3.24% BED, 3.03% EDNOS | Age, marital status, student status                                                   | Effects: Younger age, single/separated, higher education, current student (lifetime EDs).<br>Null effects: n/a                            |
| [25]                                                          | 3-year follow-up | 877  | 95.3 | 9 <sup>th</sup> -12 <sup>th</sup> grade girls followed from the 9 <sup>th</sup> to the 12 <sup>th</sup> grade in 4 northern California high schools | NR     | Interview: clinical interview based on DSM-III-R BN criteria and the EDE | USA       | M = 14.9 (SD = 0.49) | 100 | Longitudinal    | Current: partial ED 7.6%                                                                                   | Acculturation (within ethnicity)                                                      | Effects: Higher acculturation (Hispanic: partial EDs).<br>Null effects: Acculturation (European/Asian: partial EDs).                      |
| St Louis Personality Health and Lifestyle Survey (SLPHL) [26] | Baseline         | 917  | 28   | Adults in St Louis City, St Louis County, and 5 surrounding counties                                                                                | 2001-2 | Questionnaire: PHQ for DSM-IV BED                                        | USA       | M = 44 (SD=14)       | 55  | Cross-sectional | Current: 7.2% BED                                                                                          | Sex, ethnicity (White, Black, Other), age, education, marital status                  | Effects: n/a<br>Null effects: Sex, ethnicity, age, education, marital status (current BED).                                               |
| Health Omnibus Survey [27]                                    | Baseline         | 3001 | 71.5 | Adults residing in households in South Australia                                                                                                    | 1995   | Interview: questions based on the EDE and Oxford criteria                | Australia | 15-94                | 60  | Cross-sectional | Current: 0.7% BN, 2.5% BED                                                                                 | Sex, age                                                                              | Effects: Female sex (current BN vs. BED).<br>Null effects: Age (current BN vs. BED).                                                      |

|                                                    |                  |       |                         |                                                                                     |        |                                               |         |        |      |                 |                                                                                                                              |                                                                                  |                                                                                                                                                                                             |
|----------------------------------------------------|------------------|-------|-------------------------|-------------------------------------------------------------------------------------|--------|-----------------------------------------------|---------|--------|------|-----------------|------------------------------------------------------------------------------------------------------------------------------|----------------------------------------------------------------------------------|---------------------------------------------------------------------------------------------------------------------------------------------------------------------------------------------|
| National Comorbidity Replication Survey [28, 29]   | Baseline         | 9282  | 70.9                    | Adults residing in households in the USA                                            | 2001-3 | Interview: CIDI for ICD-10 and DSM-IV         | USA     | 18-60+ | 55.4 | Cross-sectional | Lifetime: 0.6% AN, 1.0% BN, 2.8% BED, 1.2% sub-threshold BED, 4.64% EDNOS<br>12mo: 0.3% BN, 1.2% BED, 0.6% sub-threshold BED | Sex, age                                                                         | Effects:<br>Female sex, younger (12mo AN, BN, BED; lifetime AN, BN, BED, sub-threshold BED).<br><br>Null effects:<br>Sex, age (12mo sub-threshold BED).                                     |
| [30, 31]                                           | Baseline         | 595   | 98.2                    | 9 <sup>th</sup> graders from 6 schools in the Jakobstad region of Finland           | 2004-5 | Interview: RAB-T for DSM-IV                   | Finland | 15-15  | 48   | Cross-sectional | Current: 0.3% AN, 0% BN, 0.8% EDNOS-AN, 0.2% EDNOS-BN<br>Lifetime: 0.8% AN, 0% BN, 2.4% EDNOS-AN, 0.2% EDNOS-BN              | Sex                                                                              | Effects:<br>Female sex (current and lifetime EDs).<br><br>Null effects:<br>n/a                                                                                                              |
|                                                    | 3-year follow-up | 462   | 77.6                    |                                                                                     | 2007-8 |                                               |         | 18-18  | 50.6 | Cross-sectional | Current: 0% AN, 0.2% BN, 0.2% EDNOS-AN, 0.4% EDNOS-BN<br>Lifetime: 1.3% AN, 0.2% BN, 3.9% EDNOS-AN, 0.6% EDNOS-BN            |                                                                                  | Effects:<br>Female sex (current and lifetime EDs).<br><br>Null effects:<br>n/a                                                                                                              |
| School Health Promotion Study [32, 33]             | Baseline         | 38517 | NR                      | 8 <sup>th</sup> and 9 <sup>th</sup> graders in four regions and 13 towns of Finland | 1998   | Questionnaire: based on DSM-IV BN criteria    | Finland | 14-16  | 50   | Cross-sectional | Lifetime: 1.6% BN                                                                                                            | Age, onset of menarche/oigarche                                                  | Effects:<br>Older age, earlier onset of menarche/oigarche (lifetime BN).<br><br>Null effects:<br>n/a                                                                                        |
| School Health Promotion Study [34]                 | Baseline         | 8787  | >99                     | 8 <sup>th</sup> and 9 <sup>th</sup> graders in four regions and 13 towns of Finland | 1995   | Questionnaire: based on DSM-III-R BN criteria | Finland | 14-16  | 51   | Cross-sectional | Lifetime: 1.0% BN                                                                                                            | Sex, age, menarche/oigarche, urbanicity, parental education, parental employment | Effects:<br>Female sex, commenced menarche/oigarche (lifetime BN); older (females: lifetime BN).<br><br>Null effects:<br>Urbanicity, parental education, parental employment (lifetime BN). |
| National Comorbidity Survey Replication Adolescent | Baseline         | 10123 | 82.5% (household), 83.7 | School-attending adolescents from households in the National                        | 2001-4 | Interview: CIDI for DSM-IV                    | USA     | 13-18  | 51   | Cross-sectional | 1mo: 1.1% ED<br>12mo: 2.8% ED, 0.2% AN, 0.6% BN, 0.9% BED,                                                                   | Sex, number siblings, age, ethnicity, parental education, parental marital       | Effects:<br>Female sex (lifetime BN, BED, sub-threshold AN); Hispanic vs. Black/White/Other ethnicity (lifetime BN); having siblings (EDs).<br><br>Null effects:                            |

|                                                                      |          |       |            |                                                                                                      |      |                                                              |                                                                                                                                          |        |     |                 |                                                                                                                                                                                                                                                      |                                                                         |                                                                                                                                                                                                                                                  |
|----------------------------------------------------------------------|----------|-------|------------|------------------------------------------------------------------------------------------------------|------|--------------------------------------------------------------|------------------------------------------------------------------------------------------------------------------------------------------|--------|-----|-----------------|------------------------------------------------------------------------------------------------------------------------------------------------------------------------------------------------------------------------------------------------------|-------------------------------------------------------------------------|--------------------------------------------------------------------------------------------------------------------------------------------------------------------------------------------------------------------------------------------------|
| Supplement [29, 35, 36]                                              |          |       | % (school) | Comorbidity Survey<br>Replication and a representative sample of schools in the adult sample areas   |      |                                                              |                                                                                                                                          |        |     |                 | 1.1% sub-threshold BED<br>Lifetime:<br>4.78% EDNOS, 0.3% AN, 0.9% BN, 1.6% BED, 0.8% sub-threshold AN, 2.5% sub-threshold BED                                                                                                                        | status, SES, urbanicity                                                 | Adult status (lifetime EDNOS); ethnicity (lifetime AN, BED, sub-threshold AN, sub-threshold BED); sex (lifetime AN, subclinical BED); age, parental education, parental marital status, SES, urbanicity (lifetime AN, BN, BED, subclinical BED). |
| World Health Organization World Mental Health Survey Initiative [37] | Baseline | 24124 | 68.8       | Adults from 14 countries                                                                             | NR   | Interview: CIDI for DSM-IV                                   | Colombia, Brazil, Mexico, Romania, Belgium, France, Germany, Italy, The Netherlands, New Zealand, Northern Ireland, Portugal, Spain, USA | 18-60+ | NR  | Cross-sectional | Lifetime:<br>1.0% BN, 1.9% BED<br>12mo:<br>0.4% BN, 0.8% BED                                                                                                                                                                                         | Age, sex, student status, education level, marital status, age of onset | Effects:<br>Younger, female sex, current student, lower education (lifetime BN, BED).<br><br>Null effects:<br>Marital status (lifetime BN, BED).                                                                                                 |
| [38]                                                                 | Baseline | 1000  | n/s        | Tyrolean women                                                                                       | 1997 | Interview: clinical interview with questions based on DSM-IV | Austria                                                                                                                                  | 15-85  | 100 | Cross-sectional | Current:<br>3.3% BED, 1.2% BN-NP, 0.3% BN-P                                                                                                                                                                                                          | Age                                                                     | Effects:<br>Younger (current BN).<br><br>Null effects:<br>Age (current BED).                                                                                                                                                                     |
| [39]                                                                 | Baseline | 1960  | 98.6       | 9 <sup>th</sup> and 10 <sup>th</sup> graders at 13 secondary schools in Sør-Trøndelag County, Norway | NR   | Questionnaire: SEDs for DSM-IV and DSM-III-R                 | Norway                                                                                                                                   | 14-15  | 52  | Cross-sectional | Girls lifetime:<br>0.7% DSM-IV AN, 0.7% DSM-III-R AN, 1.2% DSM-IV BN, 3.6% DSM-III-R BN, 1.5% DSM-IV BED, 1.5% DSM-III-R BED, 14.6% DSM-IV EDNOS, 12.9% DSM-III-R EDNOS<br>Boys lifetime:<br>0.2% DSM-IV AN, 0.2% DSM-III-R AN, 0.4% DSM-IV BN, 0.6% | Age, urbanicity                                                         | Effects:<br>Older (girls: lifetime EDs).<br><br>Null effects:<br>Urbanicity (lifetime EDs); age (boys: lifetime EDs).                                                                                                                            |

|      |                    |      |      |                                                                                                             |      |                                                                           |         |       |      |                 |                                                                                            |                                                                                             |                                                                                                                                                                                                                        |
|------|--------------------|------|------|-------------------------------------------------------------------------------------------------------------|------|---------------------------------------------------------------------------|---------|-------|------|-----------------|--------------------------------------------------------------------------------------------|---------------------------------------------------------------------------------------------|------------------------------------------------------------------------------------------------------------------------------------------------------------------------------------------------------------------------|
|      |                    |      |      |                                                                                                             |      |                                                                           |         |       |      |                 | DSM-III-R BN, 0.9% DSM-IV BED, 0.9% DSM-III-R BED, 5.0% DSM-IV EDNOS, 4.8% DSM-III-R EDNOS |                                                                                             |                                                                                                                                                                                                                        |
| [40] | Baseline           | 52   | n/a  | Women who responded to newspaper advertisements, fliers, and from informal and formal self-help groups      | NR   | Interview: included diagnostic questions for DSM-III-R BN                 | Germany | 17-31 | 100  | Cross-sectional | n/a                                                                                        | Gender identity                                                                             | Effects:<br>Female gender-typed identity (current BN).<br><br>Null effects:<br>n/a                                                                                                                                     |
| [41] | Baseline           | 2396 | NR   | Students in Romania from randomly selected high schools                                                     | 2006 | Questionnaire: included diagnostic questions for DSM-IV EDs               | Romania | NR    | 52.4 | Cross-sectional | Current: 0.1% AN, 0.5% subclinical AN, 0.6% BN, 0.6% subclinical BN                        | Ethnicity, sex                                                                              | Effects:<br>Romanian (vs. Hungarian) ethnicity (current AN, subclinical AN, BN); female sex (current AN, subclinical AN).<br><br>Null effects<br>Ethnicity (current subclinical BN); sex (current BN, subclinical BN). |
| [42] | Baseline           | 712  | NR   | High school students                                                                                        | NR   | Questionnaire: BEQ for DSM-III BN                                         | USA     | 13-19 | 46   | Cross-sectional | Current: 7.6% BN                                                                           | Sex, ethnicity                                                                              | Effects:<br>Female sex, minority ethnicity (current BN).<br><br>Null effects:<br>n/a                                                                                                                                   |
| [43] | Baseline           | 2862 | 82.4 | Female adolescent population of Navarra                                                                     | NR   | Interview: semi-structured clinical interview for DSM-IV EDs              | Spain   | 13-22 | 100  | Longitudinal    | 18mo incidence: 4.8% ED, 4.2% EDNOS, 0.3% AN, 0.3% BN                                      | Age                                                                                         | Effects:<br>Age 15-16 or > 18 years (EDNOS 18mo incidence).<br><br>Null effects:<br>Age (AN, BN 18mo incidence).                                                                                                       |
|      | 18-month follow-up | 2509 | 91.5 | Participants in a sample of the female adolescent population of Navarra without EDs at baseline             | NR   |                                                                           |         |       |      |                 |                                                                                            |                                                                                             |                                                                                                                                                                                                                        |
| [44] | Baseline           | 3288 | 93.2 | 6 <sup>th</sup> – 12 <sup>th</sup> graders at 23 public schools and 1 private school in Haute-Marne, France | 1988 | Questionnaire: included diagnostic questions for DSM-III and DSM-III-R BN | France  | 12-19 | 52.7 | Cross-sectional | Current: 0.7% DSM-III-R BN, 1.3% DSM-III BN                                                | Sex, age, education level, parental marital status, parental occupation, family composition | Effects:<br>Female sex (current BN), older (girls: current BN).<br><br>Null effects:<br>Education, parental marital status, parental occupation, family composition (current BN).                                      |



|                                                                                                                                                                  |                    |       |           |                                                                                                                                                                                                                 |                       |                                                             |                     |                     |      |                 |                                                                                                                                                                                       |                                      |                                                                                                                                                                                                                                                                                                                                                                            |
|------------------------------------------------------------------------------------------------------------------------------------------------------------------|--------------------|-------|-----------|-----------------------------------------------------------------------------------------------------------------------------------------------------------------------------------------------------------------|-----------------------|-------------------------------------------------------------|---------------------|---------------------|------|-----------------|---------------------------------------------------------------------------------------------------------------------------------------------------------------------------------------|--------------------------------------|----------------------------------------------------------------------------------------------------------------------------------------------------------------------------------------------------------------------------------------------------------------------------------------------------------------------------------------------------------------------------|
| [45]                                                                                                                                                             | Baseline           | 1710  | 61        | 9 <sup>th</sup> – 12 <sup>th</sup> graders at 9 schools in urban and rural Oregon                                                                                                                               | 1987-9                | Interview: K-SADS for DSM-III-R                             | USA                 | M = 16.6 (SD = 1.2) | 52.9 | Cross-sectional | Current: 0% AN, 0.18% BN<br>Lifetime: 0.23% AN, 0.53% BN                                                                                                                              | Sex                                  | Effects:<br>Female sex (lifetime EDs, BN).<br><br>Null effects:<br>Sex (current EDs, AN, BN; lifetime AN).                                                                                                                                                                                                                                                                 |
|                                                                                                                                                                  | 12-month follow-up | 1508  | 88.2      |                                                                                                                                                                                                                 |                       |                                                             |                     | NR                  | NR   | Cross-sectional | Current: 0% AN, 0.27% BN<br>Lifetime: 0.40% AN, 0.93% BN                                                                                                                              |                                      | Effects:<br>Female sex (lifetime EDs, AN, BN).<br><br>Null effects:<br>Sex (current EDs, AN, BN).                                                                                                                                                                                                                                                                          |
| Mid-Atlantic Twin Registry (MATR); Norwegian Institute of Public Health Twin Panel (NIPHTP); and Swedish Twin study of Adults: Genes and Environment (STAGE)[46] | Baseline           | 21856 | NR        | Twins on the MATR, NIPHTP, and STAGE registries                                                                                                                                                                 | 2005 (STAGE registry) | Questionnaire: based on the SCID for DSM-IV                 | USA, Norway, Sweden | NR                  | NR   | Cross-sectional | For ED prevalence estimates, registry x zygosity, see [46]                                                                                                                            | Sex (within sample)                  | Effects:<br>Female sex (MATR: lifetime BN, broad BN, BED, broad BED); female sex (STAGE: lifetime broad AN, BN, broad BN)<br><br>Null effects:<br>Sex (NIPHTP: lifetime BN).                                                                                                                                                                                               |
| [47]                                                                                                                                                             | Baseline           | 257   | NR        | 9 <sup>th</sup> – 12 <sup>th</sup> graders at two public high schools in southeastern Georgia                                                                                                                   | NR                    | Questionnaire: included diagnostic questions for DSM-III BN | USA                 | 14-18+              | 65   | Cross-sectional | Current: 4.7% BN                                                                                                                                                                      | Sex, ethnicity, education level, age | Effects:<br>Female sex (current BN).<br><br>Null effects:<br>Ethnicity, education, age (current BN).                                                                                                                                                                                                                                                                       |
| NIMH Collaborative Psychiatric Epidemiological Studies (CPES) [48]                                                                                               | Baseline           | 14301 | 70.9-75.5 | Participants in three nationally representative USA samples: The National Survey of American Life (NSAL), The National Latino and Asian American Study (NLAAS), and the National Comorbidity Survey Replication | 2001-3                | Interview: CIDI for DSM-IV                                  | USA                 | 18+                 | NR   | Cross-sectional | Lifetime:<br>White: 0.39% AN, 0.51% BN, 1.41% BED<br>Latino: 0.08% AN, 2.03% BN, 2.11% BED<br>Asian: 0.10% AN, 1.50% BN, 1.24% BED<br>African-American: 0.15% AN, 1.31% BN, 1.48% BED | Ethnicity                            | Effects:<br>Latino (vs. White), African-American (vs. White) ethnicity (12mo and lifetime BN).<br><br>Null effects:<br>White vs. Asian ethnicity (12mo BN); White vs. Asian, Latino, or African American ethnicity (12mo AN); White vs. Asian, Latino, or African American ethnicity (lifetime BED); White vs. Asian, Latino, or African American ethnicity (lifetime AN). |

|                                 |                |      |      |                                                                                                        |        |                                              |           |       |     |                 |                                                                                                                                                                                   |                                                                                                     |                                                                                                                                                                                   |
|---------------------------------|----------------|------|------|--------------------------------------------------------------------------------------------------------|--------|----------------------------------------------|-----------|-------|-----|-----------------|-----------------------------------------------------------------------------------------------------------------------------------------------------------------------------------|-----------------------------------------------------------------------------------------------------|-----------------------------------------------------------------------------------------------------------------------------------------------------------------------------------|
|                                 |                |      |      | (NCS-R)                                                                                                |        |                                              |           |       |     |                 | 12mo:<br>White: 0.03% AN, 0.16% BN, 0.55% BED<br>Latino: 0.03% AN, 1.01% BN, 1.11% BED<br>Asian: 0.05% AN, 0.58% BN, 0.70% BED<br>African-American: 0.06% AN, 0.60% BN, 0.68% BED |                                                                                                     |                                                                                                                                                                                   |
| [49]                            | Baseline       | 2862 |      | Female students attending 39 schools in Navarra, Spain                                                 | 1997   | Interview: clinical interview for DSM-IV EDs | Spain     | 12-21 | 100 | Longitudinal    | 18mo incidence: 3.6% ED                                                                                                                                                           | Number siblings, birth order, parental marital status                                               | Effects:<br>Separated/widowed parents (ED 18mo incidence).<br><br>Null effects:<br>Number of siblings, birth order on (ED 18mo incidence).                                        |
|                                 | 18mo follow-up | 2509 |      |                                                                                                        | 1998-9 |                                              |           |       |     |                 |                                                                                                                                                                                   |                                                                                                     |                                                                                                                                                                                   |
| Health Omnibus Survey [50]      | Baseline       | 3034 | 60.7 | Adults residing in households in South Australia                                                       | 2008   | Interview: self-report lifetime AN           | Australia | 15+   | 51  | Cross-sectional | Lifetime: 2.9% AN                                                                                                                                                                 | Sex, age, marital status, urbanicity, country of birth (Australia/Other), education level, SES      | Effects:<br>Female sex, younger, regional residence, higher education, lower SES (lifetime AN).<br><br>Null effects:<br>Marital status, country of birth (lifetime AN).           |
| Simmons Longitudinal Study [51] | Follow-up      | 68   | 95.8 | Subset of eating disordered and non-eating disordered participants from the Simmons Longitudinal Study | NR     | Interview: DIS-IV for DSM-IV EDs             | USA       | 27-27 | 100 | Cross-sectional | n/a                                                                                                                                                                               | Ethnicity (White, other), marital status, child status, educational level, occupational status, SES | Effects:<br>Lower SES (lifetime full/partial EDs).<br><br>Null effects:<br>Ethnicity, marital status, child status, education, occupational status on (lifetime full/partial ED). |
| [52]                            | Baseline       | 326  | 75.5 | 5 <sup>th</sup> – 10 <sup>th</sup> grade schoolgirls from 2 public and 2 private schools in Amman      | 2008   | Questionnaire: EHQ for DSM-IV EDs            | Jordan    | 10-16 | 100 | Cross-sectional | Current: 31.0% EDNOS, 1.8% BED, 0.6% BN, 0.0% AN                                                                                                                                  | Age, menarche, parental marital status                                                              | Effects:<br>Older, commenced menarche, separated/widowed parents (current EDs).<br><br>Null effects:<br>n/a                                                                       |
| [53]                            | Baseline       | 559  | 92.9 | 4 <sup>th</sup> – 5 <sup>th</sup> grade schoolgirls from 4 schools in Bradford, UK                     | NR     | Interview: EDE for DSM-III-R                 | UK        | 14-16 | 100 | Cross-sectional | Current: 1.6% BN, 0.2% AN                                                                                                                                                         | Ethnicity                                                                                           | Effects:<br>Asian (vs. White) ethnicity (current BN).<br><br>Null effects:<br>Ethnicity (current AN).                                                                             |

|                                                                              |                   |       |      |                                                                                                                               |        |                                                                       |                                                            |          |      |                 |                                                                                                                               |                                                                                   |                                                                                                                                                                                                                                                                     |
|------------------------------------------------------------------------------|-------------------|-------|------|-------------------------------------------------------------------------------------------------------------------------------|--------|-----------------------------------------------------------------------|------------------------------------------------------------|----------|------|-----------------|-------------------------------------------------------------------------------------------------------------------------------|-----------------------------------------------------------------------------------|---------------------------------------------------------------------------------------------------------------------------------------------------------------------------------------------------------------------------------------------------------------------|
| 1970 British Cohort Study [54]                                               | 30-year follow-up | 11261 | 68   | Participants in the 1970 British Cohort Study (infants born in the UK in 1970)                                                | 2000   | Interview: self-reported ED                                           | UK                                                         | 30-30    | NR   | Cross-sectional | Lifetime: 0.9% AN                                                                                                             | Sex                                                                               | Effects:<br>Female sex (current AN).<br><br>Null effects:<br>n/a                                                                                                                                                                                                    |
| [55]                                                                         | Baseline          | 11261 | 100  | Schoolgirls who attended 2nd grade in various types of high schools in Tehran                                                 | 1998   | Interview: clinical interview for DSM-IV EDs                          | Iran                                                       | 16-18    | 100  | Cross-sectional | Lifetime: 0.9% AN, 3.2% BN, 1.8% partial AN, 4.8% partial BN                                                                  | Age, birth order, parental education, parental work status                        | Effects:<br>Higher maternal education (lifetime BN); at-home maternal work status, private business paternal work status (lifetime partial AN, partial BN).<br><br>Null effects:<br>Age, birth order, paternal education (lifetime AN, BN, partial AN, partial BN). |
| New Zealand Mental Health Survey [56, 57]                                    | Baseline          | 12992 | 73.3 | New Zealand adult population                                                                                                  | 2003-4 | Interview: CIDI for DSM-IV                                            | New Zealand                                                | 16+      | NR   | Cross-sectional | Lifetime: 0.6% AN, 1.3% BN<br>12mo: <0.1% AN, 0.4% BN                                                                         | Age, sex, ethnicity (lifetime only)                                               | Effects:<br>Age 25-44, female sex, Maori/Pacific ethnicity (lifetime AN, BN); younger, female sex (12mo BN).<br><br>Null effects:<br>n/a                                                                                                                            |
| [58]                                                                         | Baseline          | 1947  | 95.8 | 14-15 year-olds from 44 high schools in Victoria, Australia.                                                                  | 1992   | Questionnaire: The BET for DSM-IV                                     | Australia                                                  | 14-15    | 53   | Cross-sectional | Current: 0.1% BN, 1.4% partial BN, 0.0% AN, 0.2% partial AN                                                                   | Age, sex, country of birth (Australia/Other), parental marital status, urbanicity | Effects:<br>Female sex (current EDs); younger (3-year ED incidence).<br><br>Null effects:<br>Age (current ED); country of birth, parental marital status, urbanicity (current ED, 3-year ED incidence).                                                             |
|                                                                              | 3-year follow-up  | 1530  | 75.3 |                                                                                                                               | 1995   |                                                                       |                                                            | 17-18    | NR   | Longitudinal    | 3-year incidence: 2.1% partial BN, 0.0% other EDs                                                                             |                                                                                   |                                                                                                                                                                                                                                                                     |
| [59]                                                                         | Baseline          | 394   | n/a  | Women (judged to be < 60yrs) at state-regulated bingo tournaments, in 3 lower and 6 upper income communities in Massachusetts | NR     | Questionnaire: EDs Questionnaire (Pope) for DSM-III and DSM-III-R EDs | USA                                                        | 18-60    | 100  | Cross-sectional | Current: 15.5% DSM-III/DSM-III-R BN, 9.6% DSM-III-R BN, 1.0% DSM-III/DSM-III-R AN                                             | Upper/lower class community, household income                                     | Effects:<br>Lower household income (current DSM-III-R BN, DSM-III-R BN).<br><br>Null effects:<br>Upper/lower class community (current DSM-III-R BN, DSM-III-R BN, DSM-III-R AN); household income (current DSM-III-R AN).                                           |
| European Study of the Epidemiology of Mental Disorders (ESEMeD) project [60] | Baseline          | 4139  | 61.2 | Adults in Belgium, France, Germany, Italy, the Netherlands and Spain                                                          | 2002-3 | Interview: CIDI for DSM-IV                                            | Belgium, France, Germany, Italy, the Netherlands and Spain | M = 47.1 | 51.6 | Cross-sectional | Lifetime: 0.48% AN, 0.51% BN, 1.12% BED, 0.72% sub-threshold BED<br>12mo: 0% AN, 0.15% BN, 0.31% BED, 0.09% sub-threshold BED | Age                                                                               | Effects:<br>Younger (lifetime EDs, AN, BN, BED).<br><br>Null effects:<br>n/a                                                                                                                                                                                        |

|                                  |                  |      |      |                                                                                               |        |                                                  |        |          |      |                 |                                                                                              |                                                                                                                       |                                                                                                                                         |
|----------------------------------|------------------|------|------|-----------------------------------------------------------------------------------------------|--------|--------------------------------------------------|--------|----------|------|-----------------|----------------------------------------------------------------------------------------------|-----------------------------------------------------------------------------------------------------------------------|-----------------------------------------------------------------------------------------------------------------------------------------|
| Teen Health 2000 (TH2K) [61, 62] | Baseline         | 4175 | 66   | Adolescents from households in Houston, enrolled in local health maintenance organizations    | 2000   | Interview: DISC-IV for DSM-IV                    | USA    | 11-17    | 48.9 | Cross-sectional | 12mo: 0.28% AN, 0% BN                                                                        | Ethnicity (African, European, Mexican American), sex, age, family income, parental education, parental marital status | Effects: Female sex (12mo EDs).<br>Null effects: Ethnicity, age, family income, parental education, parental marital status (12mo EDs). |
| [63]                             | 2-year follow-up | 1076 | 60.9 | Participants who were originally recruited at age 12-13 from 22 schools in Ciudad Real, Spain | 1998-9 | Interview: SCAN for DSM-IV                       | Spain  | 14-15    | 53.5 | Cross-sectional | Current: 0.1% AN, 0.75% BN, 2.88% EDNOS                                                      | Sex                                                                                                                   | Effects: Female sex (EDs).<br>Null effects: n/a                                                                                         |
| [64]                             | Baseline         | 544  | NR   | Adolescents in Valencia, Spain                                                                | 1998-9 | Interview: clinical interview for for ICD-10 EDs | Spain  | 12-18    | NR   | Cross-sectional | Current: 0.22% AN, 0.20% BN                                                                  | Sex, age                                                                                                              | Effects: Female sex, older (EDs).<br>Null effects: n/a                                                                                  |
| [65]                             | Baseline         | 678  | 67.8 | 15 year-olds in public schools from Buskerud county, Norway                                   | NR     | Interview: DSED for DSM-IV EDs                   | Norway | 15-15    | 68   | Cross-sectional | Current: 1.0% BED, 0.7% BN, 0.3% AN-BP, 0.7% subclinical BN                                  | Sex                                                                                                                   | Effects: Female sex (EDs).<br>Null effects: n/a                                                                                         |
| [66]                             | Baseline         | 258  |      | Students from 17 primary schools in Tarragona, Spain                                          | 2002   | Interview: DICA for DSM-IV                       | Spain  | 9.4-13.5 | 51.4 | Longitudinal    | Current: 0% AN, 0% BN, 0.07% BED, 2.3% EDNOS, 1.04% subclinical ED                           | Sex                                                                                                                   | Effects: Female sex (2-year ED incidence).<br>Null effects: n/a                                                                         |
|                                  | 2-year follow-up | 200  | 77.5 |                                                                                               | 2004   |                                                  |        | 13-15    | 54   |                 | Current: 0% AN, 0.22% BN, 0.22% BED, 0.81% EDNOS, 2.39% subclinical AN, 0.14% subclinical BN |                                                                                                                       |                                                                                                                                         |
| [67, 68]                         | Baseline         | 1164 | NR   | 6 <sup>th</sup> – 9 <sup>th</sup> grade school girls from Tucson, Arizona and                 | NR     | Interview: McKnight EDE for DSM-IV               | USA    | NR       | 100  | Longitudinal    | Current: 2.0% ED                                                                             | Ethnicity (within region)                                                                                             | Effects: Hispanic ethnicity (Arizona: 3-year ED incidence).<br>Null effects:                                                            |
|                                  | 3-year follow-up | 1103 | 60%  |                                                                                               | NR     |                                                  |        | NR       |      |                 | 3-year incidence:                                                                            |                                                                                                                       |                                                                                                                                         |

|                                                                      |                   |      |     |                                                                                                                                                   |    |                                                                |     |                     |     |                 |                                                           |                                                                                                        |                                                                                                                                                                                                                  |
|----------------------------------------------------------------------|-------------------|------|-----|---------------------------------------------------------------------------------------------------------------------------------------------------|----|----------------------------------------------------------------|-----|---------------------|-----|-----------------|-----------------------------------------------------------|--------------------------------------------------------------------------------------------------------|------------------------------------------------------------------------------------------------------------------------------------------------------------------------------------------------------------------|
|                                                                      |                   |      |     | Hayward, California                                                                                                                               |    |                                                                |     |                     |     |                 | 2.9% ED                                                   |                                                                                                        | Ethnicity (current EDs).                                                                                                                                                                                         |
| Coronary Artery Risk Development in Young Adults (CARDIA) study [69] | Follow-up         | 5115 | 51  | 18-30 year-olds recruited using community-based sampling and membership of a large health care plan                                               | NR | Questionnaire: QEWP-R for DSM-IV BED                           | USA | 18-30               | 54  | Cross-sectional | Current: 1.5% BED                                         | Ethnicity (within sex)                                                                                 | Effects:<br>White (vs. black) ethnicity (males: current BED).<br>Null effects:<br>Ethnicity (female: current BED).                                                                                               |
| [70]                                                                 | Baseline          | 496  | 56% | Adolescent girls from 4 public and 4 private Metropolitan middle schools in southwestern USA                                                      | NR | Interview: EDE for DSM-IV                                      | USA | 11-15               | 100 | Cross-sectional | Current: 1.6% AN, 4.8% BN, 1.0% BED                       | Menarche status                                                                                        | Effects:<br>n/a<br>Null effects:<br>Menarche status (current AN, BN, BED).                                                                                                                                       |
| New England Women's Health Project (NEWHP) [71]                      | Baseline          | 212  | n/a | BED cases and matched psychiatric and healthy controls from the NEWHP study: 18-40 year-old White or Black US born females in Boston and New York | NR | Interview: SCID-IV and EDE for DSM-IV                          | USA | 18-40               | 100 | Cross-sectional | n/a                                                       | Ethnicity, education level, age                                                                        | Effects:<br>Older (current BED vs. BN-P).<br>Null effects:<br>Age (BED vs. BN-NP); ethnicity, education (BED vs. BN-P vs. BN-NP).                                                                                |
| National Growth and Health Study-Wave II (NGHS-Wave II) [72, 73]     | 10-year follow-up | 1560 | 86  | Participants recruited in the NGHS study as 9-10 year-old White and Black USA-born females from California, Ohio, and District of Columbia        | NR | Interview: SCID and EDE for DSM-IV Questionnaire: DEMQ for NES | USA | M = 21.5 (SD = 0.7) | 100 | Cross-sectional | Current: 1.6% NES<br>Lifetime: 1.5% AN, 1.3% BN, 2.1% BED | Ethnicity. For NES (within Black participants): age, parental education, welfare status, child status. | Effects:<br>White ethnicity (lifetime EDs); Black ethnicity (current NES); parent to more than one child (Black: current NES).<br>Null effects:<br>Age, parental education, welfare status (Black: current NES). |

|                                                                                                                                                            |          |      |                              |                                                                                                                             |        |                                                             |             |        |      |                 |                                                                                                                                                       |                                                    |                                                                                                                                                                       |
|------------------------------------------------------------------------------------------------------------------------------------------------------------|----------|------|------------------------------|-----------------------------------------------------------------------------------------------------------------------------|--------|-------------------------------------------------------------|-------------|--------|------|-----------------|-------------------------------------------------------------------------------------------------------------------------------------------------------|----------------------------------------------------|-----------------------------------------------------------------------------------------------------------------------------------------------------------------------|
| Mexican National Comorbidity Survey (MNCS), National Latino and Asian American Study (NLAAS), and the National Comorbidity Survey Replication (NCS-R) [74] | Baseline | 2268 | 70.9-76.6                    | Participants of Mexican origin from 2 US and 1 Mexican nationally representative adult population surveys                   | 2001-3 | Interview: CIDI for DSM-IV                                  | USA, Mexico | 18-89  | 49.8 | Cross-sectional | Current: 1.7% BED                                                                                                                                     | Country of residence, parental migration status    | Effects: USA residence, both parents USA-born (current BED).<br>Null effects: n/a                                                                                     |
| [75]                                                                                                                                                       | Baseline | 3615 | 94                           | Young females attending and not attending school in Hungary                                                                 | 1998   | Questionnaire: included diagnostic questions for DSM-IV EDs | Hungary     | 15-24  | 100  | Cross-sectional | Current: 0.03% AN, 0.41% BN, 1.09% subclinical AN, 1.48% subclinical BN                                                                               | Student status, parental education                 | Effects: Current student (current EDs, subclinical AN), higher parental education (current EDs).<br>Null effects: Student status (current BN, subclinical BN)         |
| National Survey of American Life (NSAL) [76]                                                                                                               | Baseline | 6361 | 73 (adults) 81 (adolescents) | Adults and adolescents residing in households in the USA                                                                    | 2001-3 | Interview: CIDI for DSM-IV-TR                               | USA         | 13-94  | NR   | Cross-sectional | 12mo (adults): 0.05% AN, 0.69% BN, 0.78% BED<br>12mo (adolescents): 0.07% AN, 0.40% BN, 0.28% BED<br>Lifetime (adults): 0.17% AN, 1.49% BN, 1.66% BED | Ethnicity (African American, Black Caribbean), sex | Effects: Female sex (adults: 12mo BN, BED).<br>Null effects: Sex (adults: lifetime AN, BN, BED; adolescents: 12mo BN, BED); ethnicity (lifetime and 12mo AN, BN, BED) |
| [77]                                                                                                                                                       | Baseline | 301  | 65.1                         | Participants with chronic fatigue and controls selected from a representative telephone survey of residents in Chicago, USA | NR     | Interview: SCID for DSM-IV                                  | USA         | 18-59+ | 70.4 | Cross-sectional | NR                                                                                                                                                    | Sex                                                | Effects: n/a<br>Null effects: Sex (EDs).                                                                                                                              |

|                                                                |                   |      |      |                                                                                                                     |        |                                           |           |                                                                  |      |                 |                                                                                                                              |                                                                                              |                                                                                                                                                                                               |
|----------------------------------------------------------------|-------------------|------|------|---------------------------------------------------------------------------------------------------------------------|--------|-------------------------------------------|-----------|------------------------------------------------------------------|------|-----------------|------------------------------------------------------------------------------------------------------------------------------|----------------------------------------------------------------------------------------------|-----------------------------------------------------------------------------------------------------------------------------------------------------------------------------------------------|
| The Longitudinal Study of Kindergarten Children in Quebec [78] | 10-year follow-up | 798  | 56.2 | Participants of a representative cohort recruited as 6 year-olds entering French-speaking schools in Quebec, Canada | 1996-7 | Interview: DISC-2 for DSM-III-R           | Canada    | 16-16                                                            | 100  | Cross-sectional | Current: 0.6% AN, 0% BN, 3.5% subclinical AN, 3.8% subclinical BN, 10.8% subclinical BED                                     | Parental education, parental employment status, parental immigrant status                    | Effects: n/a<br>Null effects: Parental education, parental employment status, parental immigrant status (current AN, BN, subclinical AN, subclinical BN, subclinical BED).                    |
| [79]                                                           | Baseline          | 2907 | 96.9 | 10 <sup>th</sup> - 11 <sup>th</sup> graders attending high schools in Edirne, Turkey                                | NR     | Interview: SCID for DSM-III-R             | Turkey    | ED group: M = 17.04 (SD = 0.8)<br>Controls : M = 16.9 (SD = 0.7) | 54   | Cross-sectional | Current: 0.03% AN, 0.79% BN, 1.51% EDNOS, 1.00% BED                                                                          | Sex, age                                                                                     | Effects: n/a<br>Null effects: Sex, age (current EDs).                                                                                                                                         |
| Australian NHMRC Twin Register (ATR) [80]                      | Follow-up         | 3845 | 79   | Females on the ATR                                                                                                  | 1992-3 | Interview: SSAGA for DSM-III-R            | Australia | 28-90                                                            | 100  | Cross-sectional | Lifetime: 0.4% AN, 1.8% BN                                                                                                   | Age                                                                                          | Effects: Age < 45 (lifetime BN).<br>Null effects: Age (lifetime AN).                                                                                                                          |
| Virginia Twin Registry (VTR) [81, 82]                          | Follow-up         | 2163 | NR   | Caucasian female same-sex twins on the VTR                                                                          |        | Interview: SCID for DSM-III and DSM-III-R | USA       | M = 30.1 (SD = 7.6)                                              | 100  | Cross-sectional | Lifetime: 0.51% AN, 2.5% broad BN-P, 3.2% broad BN-NP                                                                        | Parental education. For BN subtype comparison: age, education, marital status, family income | Effects: Higher parental education (lifetime AN).<br>Null effects: Age, education, marital status, parental education, family income (lifetime broad BN-P vs. broad BN-NP).                   |
| Early Developmental Stages of Psychopathology study [83]       | Baseline          | 3021 | 71   | 14-24 year olds on the Bavarian government registry of residents in metro Munich                                    | 1995   | Interview: CIDI for DSM-IV                | Germany   | 14-24                                                            | 50.1 | Cross-sectional | 12mo: 0.1% AN, 0.5% atypical AN, 0.3% BN, 0.6% atypical BN<br>Lifetime: 0.6% AN, 0.8% atypical AN, 0.9% BN, 1.1% atypical BN | Sex, age, education, living arrangement (parent/alone/partner/spouse), SES, urbanicity       | Effects: Female sex (12mo and lifetime AN, atypical AN, atypical BN); older, female sex, lower SES (lifetime EDs).<br>Null effects: Education, living arrangement, urbanicity (lifetime EDs). |

|                                                            |          |       |      |                                                                                                                                                                                                                        |       |                                                                 |        |                         |      |                 |                                                                                                                                                       |                     |                                                                                                                                      |
|------------------------------------------------------------|----------|-------|------|------------------------------------------------------------------------------------------------------------------------------------------------------------------------------------------------------------------------|-------|-----------------------------------------------------------------|--------|-------------------------|------|-----------------|-------------------------------------------------------------------------------------------------------------------------------------------------------|---------------------|--------------------------------------------------------------------------------------------------------------------------------------|
| Mental Health Supplement to the Ontario Health Survey [84] | Baseline | 9953  | 76   | Adults residing in households in Ontario                                                                                                                                                                               |       | Interview: CIDI for DSM-III-R                                   | Canada | 15-64                   |      | Cross-sectional | Lifetime (males): 0.16% AN, 0.76% partial AN, 0.13 BN, 0.95% partial BN<br>Lifetime (females): 0.66% AN, 1.15% partial AN, 1.46% BN, 1.70% partial BN | Sex, marital status | Effects:<br>Female sex (lifetime EDs); not living with a spouse (males: lifetime EDs).<br><br>Null effects:<br>n/a                   |
| [85]                                                       | Baseline | 1849  | 74.9 | Norwegian female adult population                                                                                                                                                                                      | 1991  | Questionnaire: SEDs for DSM-III-R                               | Norway | M = 36.9<br>(SD = 11.9) | 100  | Cross-sectional | Current: 0.0% AN, 1.2% BN, 0.5% BED, 2.7% EDNOS<br>Lifetime: 0.1% AN, 2.0% BN, 0.9% BED, 6.3% EDNOS                                                   | Age                 | Effects:<br>Younger (current and lifetime EDs).<br><br>Null effects:<br>n/a                                                          |
|                                                            | Baseline | 1521  | 45.8 |                                                                                                                                                                                                                        | 2004  |                                                                 |        | M = 46.4<br>(SD = 12.7) |      | Cross-sectional | Current: 0.0% AN, 1.8% BN, 0.3% BED, 1.8% EDNOS<br>Lifetime: 0.2% AN, 4.1% BN, 0.7% BED, 5.0% EDNOS                                                   |                     | Effects:<br>Younger (current and lifetime EDs).<br><br>Null effects:<br>n/a                                                          |
| Epidemiological Catchment Area study [86]                  | Baseline | 18152 | 76   | White, Black, Hispanic, Asian and Pacific Islander adults from 5 community catchment areas: New Haven (Connecticut), Baltimore (Maryland), St. Louis (Missouri), Durham (North Carolina), and Los Angeles (California) | 1980s | Interview: NIMH Diagnostic Interview Schedule (DIS) for DSM-III | USA    | 18-64+                  | 53.4 | Cross-sectional | Lifetime: 0.9% AN (White), 0.4% AN (Black), 0.4% AN (Hispanic), 0.6% AN (Asian)                                                                       | Ethnicity           | Effects:<br>White (vs. Black) ethnicity (lifetime AN).<br><br>Null effects:<br>White vs. Hispanic vs. Asian ethnicity (lifetime AN). |

Table S2: Environmental correlates of eating disorder epidemiology



| Study                       | Wave        | N   | RR (%) | Population                                                                                          | Year Recruited                                                                                                                                                          | ED Diagnosis                   | Country | Age Range           | % Female | Design          | Prevalence                                                                                                                                                                           | Correlates                                                                                | Findings                                                                                                                      |
|-----------------------------|-------------|-----|--------|-----------------------------------------------------------------------------------------------------|-------------------------------------------------------------------------------------------------------------------------------------------------------------------------|--------------------------------|---------|---------------------|----------|-----------------|--------------------------------------------------------------------------------------------------------------------------------------------------------------------------------------|-------------------------------------------------------------------------------------------|-------------------------------------------------------------------------------------------------------------------------------|
| [87]                        | Baseline    | 414 |        | National Collegiate Athletic Association, Division-I female collegiate gymnasts and swimmers/divers |                                                                                                                                                                         | Questionnaire: QEDD for DSM-IV | USA     | M = 19.1 (SD = 1.9) | 100      | Cross-sectional | Current: 4.8% sub-threshold BN, 1.0% PD, 0.5% BED                                                                                                                                    | Sport                                                                                     | Effects: n/a<br>Null effects: Sport - swimmer vs. gymnast (current EDs).                                                      |
| [88]                        | Baseline    | 898 |        | Female students from 4 Norwegian universities: Oslo, Bergen, Tronso, Trondheim                      | 1997                                                                                                                                                                    | Questionnaire: SEDs for DSM-IV | Norway  | 18-50               | 100      | Cross-sectional | Current: 4.7% BN, 0.2% AN, 0.7% BED, 9% EDNOS                                                                                                                                        | Hours of physical activity                                                                | Effects: Fewer hours of physical activity (current BED).<br>Null effects: Hours of physical activity (current BN, AN, EDNOS). |
| [89]                        | Baseline    | 458 |        | Women in the community with AN, or who are aesthetic athletes, non-aesthetic athletes, or controls  |                                                                                                                                                                         | Questionnaire                  | Israel  | 13-35               | 100      | Cross-sectional | Lifetime (aesthetic athletes): 4.5% AN, 1.8% BN, 11.7% EDNOS<br>Lifetime (non-aesthetic athletes): 1.4% AN, 1.4% BN, 5.8% EDNOS<br>Lifetime (controls): 3.2% AN, 2.8% BN, 4.4% EDNOS | Sport category                                                                            | Effects: Aesthetic vs. non-aesthetic/no sport (lifetime EDNOS, ED).<br>Null effects: Sport category (lifetime AN, BN)         |
| Virginia Twin Registry [90] | Follow-up A | 412 |        | Female twins on the VTR, born 1934-74                                                               | 1987-94                                                                                                                                                                 | Interview: SCID for DSM-III-R  | USA     |                     | 100      | Longitudinal    | Current: 3.16% BN                                                                                                                                                                    | Child sexual abuse characteristics, perpetrator characteristics, others response to abuse | Effects: Child sexual abuse involving intercourse, child sexual abuse involving the use of force/threats (current BN).        |
|                             | Follow-up B |     | 1995-7 |                                                                                                     | Null effects: Perpetrator age, perpetrator gender, perpetrator family status, receiving negative response/s after disclosure of the child sexual abuse on (current BN). |                                |         |                     |          |                 |                                                                                                                                                                                      |                                                                                           |                                                                                                                               |

|                                                                     |                  |      |      |                                                                                                                                                                                              |        |                                                          |                 |                     |     |                 |                              |                                                                                                                                                          |                                                                                                                                                                                                                                           |
|---------------------------------------------------------------------|------------------|------|------|----------------------------------------------------------------------------------------------------------------------------------------------------------------------------------------------|--------|----------------------------------------------------------|-----------------|---------------------|-----|-----------------|------------------------------|----------------------------------------------------------------------------------------------------------------------------------------------------------|-------------------------------------------------------------------------------------------------------------------------------------------------------------------------------------------------------------------------------------------|
| Dunedin Multidisciplinary Health and Development Study [91]         | Follow-up        | 941  | 92   | Participants of the Dunedin Multidisciplinary Health and Development Study, a nationally representative cohort born in 1972-3                                                                | 1993-4 | Interview: DIS for DSM-III-R                             | New Zealand     | 21-21               | 49  | Cross-sectional | Current: 1.38% ED (AN or BN) | Females only: any partner violence, severe partner violence<br>Males only: perpetrators of any partner violence, perpetrators of severe partner violence | Effects:<br>Victim of any or severe partner violence (females: current EDs).<br><br>Null effects:<br>Perpetrator of partner violence (males: current EDs).                                                                                |
| National Women's Study [92]                                         | 3-year follow-up | 3006 | 75   | Participants of the National Women's Study, a nationally representative cohort of women recruited in 1989                                                                                    | 1992   | Interview: clinical interview for DSM-IV BN and BED      | USA             | M = 46.1 (SD = 7.3) | 100 | Cross-sectional | Lifetime: 2.4% BN, 1.0% BED  | Rape, sexual molestation, aggravated assault                                                                                                             | Effects:<br>Rape victim, sexual molestation victim, aggravated assault victim (lifetime BN).<br><br>Null effects:<br>Rape, sexual molestation, aggravated assault (lifetime BED).                                                         |
| Netherlands Mental Health Survey and Incidence Study (NEMESIS) [93] | Baseline         | 7076 | 69.7 | Dutch general population aged 18-64 years                                                                                                                                                    | 1996-7 | Interview: CIDI                                          | The Netherlands | 18-64               |     | Cross-sectional | 1 mo: 0.2% EDs (AN, BN)      | Season                                                                                                                                                   | Effects:<br>n/a<br><br>Null effects:<br>Season (1 mo EDs).                                                                                                                                                                                |
| [94]                                                                | Baseline         | 360  |      | Participants (with BED, BN, other psychiatric diagnoses, and controls) selected from a sample of 16-35 year-old females on GP registers of practices in urban and rural areas of Oxfordshire |        | Interview: EDE for DSM-IV                                | England         |                     | 100 | Cross-sectional | N/A                          | Sexual assault, physical assault, bullying, parental separation, parental death, change of parent figure, frequent house moves, pregnancy, abortion.     | Effects:<br>Pregnancy, sexual assault victim, physical assault victim, bullying victim (current BED).<br><br>Null effects:<br>Parental separation, parental death, change of parent figure, frequent house moves, abortion (current BED). |
| [95]                                                                | Baseline         | 72   | 100  | Rape victims consecutively referred to a women's association and who were raped 4 to 9 months before; and demographically-matched controls                                                   |        | Interview: The Florence Psychiatric Interview for DSM-IV | Italy           |                     | 100 | Cross-sectional |                              | Sexual assault: Rape                                                                                                                                     | Effects:<br>Rape victim (current EDs).<br><br>Null effects:<br>n/a                                                                                                                                                                        |

|                                   |             |         |    |                                                                                                                                                 |        |                                                                                           |        |                                                            |      |                 |                                                                                     |                                                                           |                                                                                                                                                   |
|-----------------------------------|-------------|---------|----|-------------------------------------------------------------------------------------------------------------------------------------------------|--------|-------------------------------------------------------------------------------------------|--------|------------------------------------------------------------|------|-----------------|-------------------------------------------------------------------------------------|---------------------------------------------------------------------------|---------------------------------------------------------------------------------------------------------------------------------------------------|
| [96]                              | Baseline    | N = 193 |    | White, black, Latino gay, and bisexual men were sampled from community venues in NY                                                             | 2004-5 | Interview: CIDI for DSM-IV                                                                | USA    | M = 33 (SD = 9)                                            | 0    | Cross-sectional | Lifetime: 0.01% AN, 6.22% BN, 5.18% BED, 3.11% subclinical AN, 9.33% subclinical BN | Childhood sexual abuse                                                    | Effects: Childhood sexual abuse victim (lifetime subclinical BN).<br>Null effects: Childhood sexual abuse (lifetime AN, BN, BED, subclinical AN). |
| [97]                              | Baseline    | 45      |    | Competitive female body-builders and recreational female weight training controls, recruited through gyms in Ottawa, Canada                     |        | Questionnaire: ED section of the Computerized Diagnostic Interview Schedule for DSM-III-R | Canada |                                                            | 100  | Cross-sectional | Lifetime: 13.33% BN                                                                 | Level of body-building                                                    | Effects: n/a<br>Null effects: Level of body-building (lifetime BN).                                                                               |
| [98]                              | Baseline    | 74      |    | Men with BN (recruited from ED treatment clinics), and competitive and recreational male bodybuilders (recruited from gyms) from Ottawa, Canada |        | Questionnaire: ED section of the Computerized Diagnostic Interview Schedule for DSM-III-R | Canada |                                                            | 0    | Cross-sectional | Lifetime (body builders): 19.2% BN, 7.7% EDNOS                                      | Level of body-building                                                    | Effects: Competitive vs. recreational (lifetime BN)<br>Null effects: Level of body-building (lifetime EDNOS).                                     |
| Virginia Twin Registry (VTR) [99] | Follow-up A | 854     | 79 | Female twin pairs on the VTR, born 1934-74                                                                                                      | 1987-9 | Interview: SCID for DSM-III-R                                                             | USA    | 17-55                                                      | 100  | Longitudinal    |                                                                                     | Significant positive experiences, trauma, sexual abuse, pregnancy < 16yrs | Effects: n/a<br>Null effects: Significant positive experiences, trauma, sexual abuse, pregnancy < 16yrs (lifetime BN).                            |
|                                   | 1992-5      |         |    |                                                                                                                                                 | 22-59  |                                                                                           |        |                                                            |      |                 |                                                                                     |                                                                           |                                                                                                                                                   |
| [100]                             | Baseline    | 320     |    | Newly committed offenders at the Iowa Medical and Classification Center                                                                         | 2003-5 | Interview: MINI-Plus for DSM-IV-TR                                                        | USA    | Males: M = 31.1 (SD = 9.7)<br>Females: M = 31.3 (SD = 8.4) | 17.5 | Cross-sectional | Lifetime: 2.0% ED (men), 7.0% (women)                                               | Traumatic events                                                          | Effects: n/a<br>Null effects: Traumatic events (lifetime EDs).                                                                                    |

|                                       |                   |       |      |                                                                                                                                                                                                              |        |                                                             |           |          |       |                 |                                                                                    |                                                                          |                                                                                                                                                                                                             |
|---------------------------------------|-------------------|-------|------|--------------------------------------------------------------------------------------------------------------------------------------------------------------------------------------------------------------|--------|-------------------------------------------------------------|-----------|----------|-------|-----------------|------------------------------------------------------------------------------------|--------------------------------------------------------------------------|-------------------------------------------------------------------------------------------------------------------------------------------------------------------------------------------------------------|
| [101]                                 | Baseline          | 106   |      | Dancers from national and regional ballet companies; and non-dancers                                                                                                                                         |        | Interview: clinical interview for DSM-III and DSM-III-R EDs | USA       | 13-31    | 100   | Cross-sectional | Lifetime: 21.7% AN, 28.3% DSM-III BN, 13.2% DSM-III-R BN                           | Dancing                                                                  | Effects: n/a<br>Null effects: Dancing (lifetime AN, BN).                                                                                                                                                    |
| [102]                                 | Baseline          | 355   |      | Running athletes (UK: highest ranked female distance runners. Kenya: from major race meetings, local schools and training camps) and age-matched controls (high school and university students and teachers) |        | Questionnaire: EDE-Q                                        | UK, Kenya | 15-30    | 100   | Cross-sectional | Current: 0.6% AN, 0.6% BN, 9.2% EDNOS                                              | Athlete status                                                           | Effects: Athlete in UK vs. Kenya (current EDs); UK non-athlete vs. Kenyan athlete (current EDs).<br>Null effects: n/a                                                                                       |
| [103]                                 | Baseline          | 184   | 81.4 | Female elite running athletes sourced from ranking lists and race results published in Athletics Weekly, Britain                                                                                             | 1996-7 | Questionnaire: EDE-Q                                        | Britain   | M = 28.5 | 100   | Cross-sectional | Current: 3.8% AN, 1.1% BN, 10.9% EDNOS                                             | Racing distance, hours per week training                                 | Effects: n/a<br>Null effects: Racing distance, hours per week training (current EDs).                                                                                                                       |
| Millennium Cohort Study [104]         | Baseline          | 48378 | 36   | All US military personnel on rosters as of October 2000 who completed baseline and follow-up surveys                                                                                                         | 2001-3 | Questionnaire: Patient Health Questionnaire                 | USA       |          | 26.13 | Longitudinal    | 3-year incidence: 2.81% ED (BN, BED, subclinical BN, subclinical BED)              | Deployment status, number of deployments, service branch, life stressors | Effects: Deployment with combat exposure (women: 3-year ED incidence); active duty, major life stressors (men: ED incidence).<br>Null effects: Number of deployments, service branch (3-year ED incidence). |
|                                       | 3-year follow-up  |       | 71   |                                                                                                                                                                                                              | 2004-6 |                                                             |           |          |       |                 |                                                                                    |                                                                          |                                                                                                                                                                                                             |
| Children in the Community Study [105] | Baseline          |       |      | Randomly selected mothers and one of their offspring from two upstate New York counties recruited into the Children in the Community Study in 1975                                                           | 1975   | Interview: DISC for DSM-IV                                  | USA       | M = 6    |       | Longitudinal    | 16yr prevalence: 0.1% AN, 1.3% BN, 1.2% BED, 1.2% subclinical AN, 2.3% other EDNOS | Physical neglect, child sexual abuse                                     | Effects: Physical neglect victim, child sexual abuse victim (16yr EDs).<br>Null effects:                                                                                                                    |
|                                       | 8-year follow-up  |       |      |                                                                                                                                                                                                              | 1983   |                                                             |           |          |       |                 |                                                                                    |                                                                          |                                                                                                                                                                                                             |
|                                       | 10-year follow-up |       |      |                                                                                                                                                                                                              | 1985-6 |                                                             |           |          |       |                 |                                                                                    |                                                                          |                                                                                                                                                                                                             |
|                                       | 16-year follow-up | 782   | 80.1 |                                                                                                                                                                                                              | 1991-3 |                                                             |           | M = 22   |       |                 |                                                                                    |                                                                          |                                                                                                                                                                                                             |
| School Health Promotion Study [106]   | Baseline          | 8787  | 86   | 8 <sup>th</sup> and 9 <sup>th</sup> grade school children attending 52 schools in Finland                                                                                                                    | 1995   | Questionnaire: included questions for DSM-III-R BN          | Finland   | 14-16    | 50.7  | Cross-sectional | Current: 1.8% BN (girls), 0.3% BN (boys)                                           | Bullying (within sex)                                                    | Effects: Bullying victim and perpetrator (boys: current BN).<br>Null effects: Bullying victim (girls: current BN).                                                                                          |

|                                |                   |       |                                        |                                                                                                                                                                 |        |                                                                |           |        |                 |                              |                                                 |                                                                         |                                                                                                              |
|--------------------------------|-------------------|-------|----------------------------------------|-----------------------------------------------------------------------------------------------------------------------------------------------------------------|--------|----------------------------------------------------------------|-----------|--------|-----------------|------------------------------|-------------------------------------------------|-------------------------------------------------------------------------|--------------------------------------------------------------------------------------------------------------|
| [107]                          | Baseline          | 296   |                                        | Collegiate female lightweight rowers; collegiate female runners; control collegiate women                                                                       | 1998   | Questionnaire: EDE-Q for DSM-IV                                | USA       | 100    | Cross-sectional | Current: 1.0% BN, 7.8% EDNOS | Sport                                           | Effects: n/a<br>Null effects: Running, rowing (current EDs, BN, EDNOS). |                                                                                                              |
| [108]                          | -                 | 423   |                                        | Army enlisted and officer female personnel from the general population on active duty at Fort Lewis, Washington                                                 |        | Interview: clinical interview for DSM-IV EDs                   | USA       | 17-53  | 100             | Cross-sectional              | Current: 0.2% AN, 0.7% BN, 2.6% EDNOS, 1.2% BED | External pressure                                                       | Effects: Higher external pressures (current EDs).<br>Null effects: n/a                                       |
| [109]                          | -                 | 966   | 90 (athletes), 84 (controls)           | Adolescent elite athletes attending 16 Elite Sport High Schools; age-matched controls from 2 randomly selected regular high schools, Buskerud County            | 2008-9 | Interview: based on the EDE for DSM-IV                         | Norway    | 16-16  |                 | Cross-sectional              | Current: 0.2% AN, 0.83% BN, 3.00% EDNOS         | Training volume                                                         | Effects: Lower training volume (males: current EDs)<br>Null effects: Training volume (females: current EDs). |
| [110]                          | 20-year follow-up | 1531  | 61.6 (bushfire group), 61.2 (controls) | Children attending primary school in a region devastated by bushfires, Victoria, Australia; control children attending primary schools in a neighbouring region | 1983-5 | Interview: CIDI for DSM-IV                                     | Australia |        |                 | Longitudinal                 | 1mo: 1.11% ED<br>Lifetime: 1.11% ED             | Bushfire exposure                                                       | Effects: n/a<br>Null effects: Bushfire exposure (1mo or lifetime EDs).                                       |
| [111]                          | -                 | 1278  | 34                                     | Active duty females at 3 major medical centres for the US Army, Navy, and Air Force; females in the US Marines                                                  | 1997-9 | Questionnaire: included questions for DSM-IV AN, BN, and EDNOS | USA       | 18-55+ | 100             | Cross-sectional              | Current: 1.1% AN, 8.1% BN, 62.8% EDNOS          | Corps                                                                   | Effects: Marines vs. Army, Navy, or Air Force (current AN, BN, EDNOS).<br>Null effects: n/a                  |
| 1970 British Cohort Study [54] | 30-year follow-up | 11261 | 68                                     | Participants in the 1970 British Cohort Study (infants born in the UK in 1970)                                                                                  | 2000   | Interview: self-reported ED                                    | UK        | 30-30  |                 | Cross-sectional              | Current: 0.9% AN                                | Separation from mother > 1mo old; being in social/public care           | Effects: n/a<br>Null effects: Separation from mother > 1mo old, social/public care (current AN).             |

|                                               |           |      |     |                                                                                                                                                                   |  |                                             |         |       |      |                 |                                                              |                                                                                                                                                                         |                                                                                                                                                                                                                     |
|-----------------------------------------------|-----------|------|-----|-------------------------------------------------------------------------------------------------------------------------------------------------------------------|--|---------------------------------------------|---------|-------|------|-----------------|--------------------------------------------------------------|-------------------------------------------------------------------------------------------------------------------------------------------------------------------------|---------------------------------------------------------------------------------------------------------------------------------------------------------------------------------------------------------------------|
| New England Women's Health Project [112, 113] | Baseline  | 483  |     | BED cases and matched psychiatric and healthy controls recruited in the NEWHP study: 18-40 year-old White or Black US born females residing in Boston or New York |  | Interview: SCID-IV and EDE for DSM-IV       | USA     | 18-40 | 100  | Cross-sectional | N/A                                                          | Events in past 12mo: house move, pregnancy, bereavement of loved one, change in family structure, end of intimate relationship, physical abuse, parental absence/death. | Effects:<br>House move, bereavement, change in family structure, end of intimate relationship, physical abuse (current BED).<br><br>Null effects:<br>Pregnancy, sexual abuse, parental absence/death (current BED). |
| [114]                                         | Baseline  | 165  |     | Female fashion models working for 3 agencies in Cagliari and Oristano, Sardinia; Control group of girls born in Sardinia, not employed in 'beauty' jobs           |  | Interview: EDE for DSM-IV                   | Italy   | 15-34 | 100  | Cross-sectional | Current: 1.8% AN or BN, 6.7% partial AN, 2.4% partial BN     | Model status                                                                                                                                                            | Effects:<br>Modelling (current partial AN).<br><br>Null effects:<br>Modelling (current AN/BN, partial BN).                                                                                                          |
| [115]                                         | Baseline  | 179  | 8.6 | Female running participants in 4 road races of 4 to 13 miles in length.                                                                                           |  | Questionnaire: Binge Scale for DSM-III-R BN | USA     |       | 100  | Cross-sectional | Current: 19.0% BN                                            | Miles per week running                                                                                                                                                  | Effects:<br>n/a<br><br>Null effects:<br>Miles per week running (current BN).                                                                                                                                        |
| FinnTwin16 [116]                              | Follow-up | 4388 |     | Finnish twins with known zygosity from birth cohorts born 1974-1979                                                                                               |  | Interview: SCID for DSM-IV                  | Finland | 22-28 | 55.3 | Cross-sectional | Lifetime: 1.32% AN, 2.51% broad AN, 1.00% BN, 1.39% broad BN | Zygosity groups (same-sex, opposite-sex)                                                                                                                                | Effects:<br>n/a<br><br>Null effects:<br>Zygosity (lifetime AN, BN, broad AN, broad BN).                                                                                                                             |
| [117]                                         | Baseline  | 169  | 94  | Female dancers from the 7 largest nonprofessional ballet schools; non-physically active female controls from intermediate and high schools                        |  | Interview: SCID and EDE for DSM-IV          | Italy   |       | 100  | Cross-sectional | Current: 0.59% AN, 2.37% BN, 4.73% EDNOS-AN, 5.33% EDNOS-BN  | Dancing                                                                                                                                                                 | Effects:<br>n/a<br><br>Null effects:<br>Dancing (current AN, BN, or EDNOS).                                                                                                                                         |

|                                                                                |                    |     |    |                                                                                                                                                                                    |         |                                                                                           |             |       |                 |                                                         |                                                                |                                                                                                                                                                                                         |                                                                                                                            |
|--------------------------------------------------------------------------------|--------------------|-----|----|------------------------------------------------------------------------------------------------------------------------------------------------------------------------------------|---------|-------------------------------------------------------------------------------------------|-------------|-------|-----------------|---------------------------------------------------------|----------------------------------------------------------------|---------------------------------------------------------------------------------------------------------------------------------------------------------------------------------------------------------|----------------------------------------------------------------------------------------------------------------------------|
| [118]                                                                          | Baseline           | 346 |    | Female non-elite ballet dancers, female gymnasium users, male non-competitive body-builders, female and male non-physically active controls                                        |         | Interview: EDE for DSM-IV                                                                 | Italy       | 78.6  | Cross-sectional | Current: 0.87% AN, 1.73% BN, 12.72% EDNOS               | Dance category (classical/modern), sport                       | Effects:<br>Ballet dancing, gymnasium attendance (current EDs).<br><br>Null effects:<br>Dance category (current EDs); ballet dancing (current AN, BN, EDNOS); gymnasium attendance (current AN, EDNOS). |                                                                                                                            |
| Harvard Study of Moods and Cycles: Survey of Interpersonal Relationships [119] | 2-4 year follow-up | 732 | 81 | Participants in the Harvard Study of Moods and Cycles, a representative population cohort of women aged 36-44 years recruited in 1995-7                                            | 1999    | Interview: clinical interview for DSM-IV EDs                                              | USA         | 100   | Cross-sectional | Lifetime: 6.69% any ED (AN, BN, or BED)                 | Sexual abuse, physical abuse, type of abuse, severity of abuse | Effects:<br>Sexual or physical abuse victim, physical abuse victim, physical and sexual abuse victim, severe abuse victim (lifetime EDs).<br><br>Null effects:<br>n/a                                   |                                                                                                                            |
| [120]                                                                          | Baseline           | 64  |    | ED cases and non-cases drawn from a study of a population of 12-18 year-olds in 263 townships within Valencia                                                                      | 1998-9  | Interview: clinical interview for DSM-IV EDs                                              | Italy       | 12-18 | Cross-sectional | N/A                                                     | Stressful life events and provoking agents                     | Effects:<br>Provoking agent in past 12-months (current EDs).<br><br>Null effects:<br>Number or severity of life events (current EDs).                                                                   |                                                                                                                            |
| [121]                                                                          | Baseline           | 477 | 80 | Women reporting child sexual abuse < 16 years-old and controls who did not report abuse drawn from a population study of adult women on the electoral rolls of Otago, New Zealand. |         | Interview: Present State Examination (PSE) with additional questions for ICD-10 AN and BN | New Zealand | 18+   | 100             | Cross-sectional                                         | Lifetime: 3.9% AN, 5.5% BN, 1.3% AN+BN                         | Child sexual abuse                                                                                                                                                                                      | Effects:<br>Child sexual abuse victim (lifetime AN, BN, EDs).<br><br>Null effects:<br>Child sexual abuse (lifetime AN+BN). |
| [122]                                                                          | Baseline           | 64  |    | Swimmers in the 1989 and 1990 Mjos-Svom, an open Norwegian contest; sex and age matched non-physically active controls                                                             | 1989-90 | Interview: clinical interview for DSM-III-R                                               | Norway      |       | Cross-sectional | Current: 0% AN, 1.6% BN, 0% partial AN, 4.7% partial BN | Swimming                                                       | Effects:<br>n/a<br><br>Null effects:<br>Swimming (current EDs).                                                                                                                                         |                                                                                                                            |
| Victorian Adolescent Health Cohort Study [123]                                 | Baseline           |     |    | 9 <sup>th</sup> grade females from 44 public, Catholic, and independent schools in Victoria, Australia                                                                             | 1992    | Interview: The Branched Eating Disorders Test for                                         | Australia   | 100   | Longitudinal    | 2-year incidence: 3.5% BN, 3.2% AN                      | Child sexual abuse                                             | Effects:<br>> 2 instances of child sexual abuse with/without physical contact (2-year BN incidence).<br><br>Null effects:<br>Child sexual abuse (2-year AN incidence).                                  |                                                                                                                            |

|                                                                      |                   |      |                              |                                                                                                                                                                                                                                                     |        |                                                                        |                 |                                                              |     |                 |                                                                                       |                                                               |                                                                                                                                                                        |
|----------------------------------------------------------------------|-------------------|------|------------------------------|-----------------------------------------------------------------------------------------------------------------------------------------------------------------------------------------------------------------------------------------------------|--------|------------------------------------------------------------------------|-----------------|--------------------------------------------------------------|-----|-----------------|---------------------------------------------------------------------------------------|---------------------------------------------------------------|------------------------------------------------------------------------------------------------------------------------------------------------------------------------|
|                                                                      | 10-year follow-up | 999  | 82.4                         |                                                                                                                                                                                                                                                     | 2002-3 | DSM-IV EDs                                                             |                 | 24-24                                                        |     |                 |                                                                                       |                                                               |                                                                                                                                                                        |
| [124]                                                                | Baseline          | 189  | 74 (models), 78 (controls)   | Professional fashion models from 3 important modelling agencies in Milan, Italy; controls from a population study of 18-25 year-olds in Padua                                                                                                       |        | Questionnaire: based on the EDE for DSM-IV EDs, self-reported past EDs | Italy           | Models: M = 21.7 (SD = 3.2)<br>Controls: M = 21.8 (SD = 2.8) | 100 | Cross-sectional | Current: 1.1% AN, 5.8% partial AN, 1.6% BN, 3.7% partial BN<br>Past: 2.1% AN, 3.2% BN | Modelling                                                     | Effects:<br>Modelling (current partial AN, past AN).<br><br>Null effects:<br>Modelling (current partial BN, past BN).                                                  |
| Netherlands Mental Health Survey and Incidence Study (NEMESIS) [125] | Baseline          | 1987 | 69.7                         | Female BN cases, and psychiatric, substance use disorder, dual diagnosis, and healthy controls in NEMESIS, a Dutch general population cohort aged 18-64 years                                                                                       | 1996-7 | Interview: CIDI for DSM-III-R                                          | The Netherlands | 18-64                                                        | 100 | Cross-sectional | N/A                                                                                   | Child abuse                                                   | Effects:<br>Child psychological abuse victim, child multiple abuse victim (current BN).<br><br>Null effects:<br>Child sexual abuse, child physical abuse (current BN). |
| [126]                                                                | Baseline          | 1069 | 71 (controls), 88 (athletes) | Total population of elite female athletes in the Norwegian national senior and junior teams organized by the Norwegian Olympic Committee and Confederation of Sports; age-matched group of Norwegian females from the Norwegian Population Register |        | Interview: clinical interview for DSM-IV EDs                           | Norway          | 15-39                                                        | 100 | Cross-sectional | Current: 15.81% ED                                                                    | Athlete status, sexual harassment and abuse (within athletes) | Effects:<br>Athlete (current EDs); sexual harassment and abuse victim (athletes: current EDs).<br><br>Null effects:<br>n/a                                             |
| [127]                                                                | Baseline          | 970  |                              | Female athletes who qualified for a junior or senior national team or one of the recruiting squads for those teams; age-matched group of female controls                                                                                            |        | Questionnaire: self-reported ED                                        | Norway          | 15-35                                                        | 100 | Cross-sectional | Current: 11.44% ED                                                                    | Athlete status                                                | Effects:<br>n/a<br><br>Null effects:<br>Athlete status (current EDs).                                                                                                  |



|       |          |      |                                  |                                                                                                                                                                                                                         |        |                                                                                 |         |                     |      |                 |                                                |                                         |                                                                                                                                                                                                                                                     |
|-------|----------|------|----------------------------------|-------------------------------------------------------------------------------------------------------------------------------------------------------------------------------------------------------------------------|--------|---------------------------------------------------------------------------------|---------|---------------------|------|-----------------|------------------------------------------------|-----------------------------------------|-----------------------------------------------------------------------------------------------------------------------------------------------------------------------------------------------------------------------------------------------------|
| [128] | Baseline | 2547 | 82.9 (athletes), 70.9 (controls) | Athletes in the Norwegian national senior and junior teams organized by the Norwegian Olympic Committee and Confederation of Sports; age-matched group of controls from the Norwegian Population Register               | 1997   | Interview: EDE for DSM-IV EDs                                                   | Norway  | 15-35               | 45.7 | Cross-sectional | Current: 8.83% ED                              | Athlete status, sport type (within sex) | Effects: Athlete (current EDs); anti-gravitation and weight-class sports vs. ball-game and endurance sports (males: current EDs); aesthetic sports vs. technical, ball-game, and endurance sports (females: current EDs).<br><br>Null effects: n/a. |
| [129] | Baseline | 2746 | 36.5                             | Icelandic women who were either married or cohabitating with their partner                                                                                                                                              | 2005-6 | Questionnaire: self-reported EDs                                                | Iceland | 22-67               | 100  | Cross-sectional | Current: 4.26% EDs                             | Intimate partner abuse                  | Effects: Intimate partner abuse victim (current EDs).<br><br>Null effects: n/a                                                                                                                                                                      |
| [130] | Baseline | 300  |                                  | Female collegiate cross-country runners in the USA                                                                                                                                                                      |        | Questionnaire: self-reported ED                                                 | USA     | M = 19.6 (SD = 1.6) | 100  | Cross-sectional | Lifetime: 19.3% EDs                            | Exercise load                           | Effects: n/a<br><br>Null effects: Exercise load (lifetime EDs).                                                                                                                                                                                     |
| [131] | Baseline | 529  |                                  | Adolescent dance students at the Barcelona Theatre Institute; female adolescent controls in general population of Barcelona                                                                                             |        | Questionnaire: Eating Disorders Assessment Questionnaire (CETCA) for DSM-IV EDs | Spain   | 12-17               | 100  | Cross-sectional | Current: 0.95% probable AN, 14.18% probable BN | Dancing                                 | Effects: n/a<br><br>Null effects: Dancing (current AN, BN).                                                                                                                                                                                         |
| [132] | Baseline | 1276 | 69.4                             | Female athletes in the Norwegian national senior and junior teams organized by the Norwegian Olympic Committee and Confederation of Sports; age-matched group of female controls from the Norwegian Population Register |        | Interview: EDE for DSM-IV EDs                                                   | Norway  | 13-39               | 100  | Cross-sectional | Current: 2.72% AN, 6.34% BN, 18.71% EDNOS      | Athlete status, leanness sport          | Effects: Leanness sports (current EDNOS, AN).<br><br>Null effects: Athlete status (current AN, BN, EDNOS); leanness sport (current BN).                                                                                                             |

|                                                       |                   |      |    |                                                                                                                                                                    |  |                                                         |           |       |     |                 |                                                                                                                                                     |                                                                                                                    |                                                                                                                                                                                                                                                                                                                                                                                                     |
|-------------------------------------------------------|-------------------|------|----|--------------------------------------------------------------------------------------------------------------------------------------------------------------------|--|---------------------------------------------------------|-----------|-------|-----|-----------------|-----------------------------------------------------------------------------------------------------------------------------------------------------|--------------------------------------------------------------------------------------------------------------------|-----------------------------------------------------------------------------------------------------------------------------------------------------------------------------------------------------------------------------------------------------------------------------------------------------------------------------------------------------------------------------------------------------|
| [133]                                                 | Baseline          | 195  |    | Female weight lifters at a gym and at the registration of a university weight lifting club; control students in introductory university classes                    |  | Questionnaire: self-reported current and past AN and BN | USA       | 18-35 | 100 | Cross-sectional | Current (weight lifters): 1% AN, 6% BN<br>Current (controls): 1% AN, 1% BN<br>Past (weight lifters): 17% AN, 6% BN<br>Past (controls): 5% AN, 3% BN | Weight lifting status                                                                                              | Effects:<br>Weight lifting (past AN).<br><br>Null effects:<br>Weight lifting (current BN, AN; past BN).                                                                                                                                                                                                                                                                                             |
| [134, 135]                                            | Baseline          | 306  |    | BN cases and age and SES matched controls selected from a sample of 16-35 year-old females on 23 GP registers of practices in urban and rural areas of Oxfordshire |  | Interview: EDE for DSM-III-R                            | England   | 16-35 | 100 | Cross-sectional | N/A                                                                                                                                                 | Life events 12-months prior to disordered eating onset, sexual and physical abuse prior to disordered eating onset | Effects:<br>12-months prior to disordered eating onset: major house move, pregnancy, change in family structure, sexual abuse victim, physical abuse victim (current BN); sexual abuse victim, physical abuse victim, sexually abused by a relative (current BN).<br><br>Null effects:<br>12-months prior to disordered eating onset: bereavement, new or ended intimate relationship (current BN). |
| [136]                                                 | -                 | 150  |    | BN cases and age and SES matched healthy controls selected from a sample of females on 12 GP registers in urban and rural areas of Oxfordshire                     |  | Interview: EDE for DSM-III-R                            | England   | 16-35 | 100 | Cross-sectional | N/A                                                                                                                                                 | Sexual abuse, child sexual abuse                                                                                   | Effects:<br>Sexual abuse victim, repeated sexual abuse victim, sexually abused by a relative (current BN).<br><br>Null effects:<br>Child sexual abuse (current BN).                                                                                                                                                                                                                                 |
| Western Australian Pregnancy Cohort (Raine) Study [4] | 14 year follow-up | 1597 | 56 | Participants of the Raine Study: born at a public hospital 1989-91                                                                                                 |  | Interview: ChEDE                                        | Australia | 13-15 | 45  | Longitudinal    | Current: 0.06% AN, 0.56% BN, 0.44% BED, 1.7% PD                                                                                                     | Family stress                                                                                                      | Effects:<br>Greater family stress at age 5, 8, and 10 years (current EDs).<br><br>Null effects:<br>n/a                                                                                                                                                                                                                                                                                              |
| [15]                                                  | Baseline          | 934  | 78 | Females aged 18-25 on the electoral registers of two areas of Padova, Italy                                                                                        |  | Interview: SCID for DSM-IV                              | Italy     | 18-25 | 100 | Cross-sectional | Current: 0.3% AN, 1.8% BN, 0.1% BED, 0.7% atypical AN, 2.4% atypical BN<br>Lifetime: 2.0% AN, 4.6% BN, 0.6% BED, 2.6% atypical                      | Child abuse, sexual abuse, physical abuse                                                                          | Effects:<br>Child abuse victim (lifetime AN, BN, EDs); child physical abuse victim (lifetime BN, EDs).<br><br>Null effects:<br>Child sexual abuse (lifetime AN, BN, EDs); child physical abuse (lifetime AN).                                                                                                                                                                                       |

|                                                            |          |      |      |                                                                                      |  |                                          |        |       |    |                 |                                                                                                                                                        |                                 |                                                                                                                                          |
|------------------------------------------------------------|----------|------|------|--------------------------------------------------------------------------------------|--|------------------------------------------|--------|-------|----|-----------------|--------------------------------------------------------------------------------------------------------------------------------------------------------|---------------------------------|------------------------------------------------------------------------------------------------------------------------------------------|
|                                                            |          |      |      |                                                                                      |  |                                          |        |       |    |                 | AN, 3.1% atypical BN                                                                                                                                   |                                 |                                                                                                                                          |
| Ontario Health Survey [20, 21]                             | Baseline | 8116 | 76.5 | Adults residing in households in Ontario, Canada                                     |  | Interview: CIDI for DSM-III-R and ICD-10 | Canada | 15-64 | 53 | Cross-sectional | Current: 0.76% BN (0.21% BN-P, 0.55% BN-NP), 0.34% subclinical BN                                                                                      | Child sexual abuse, foster care | Effects:<br>Sexual abuse victim (current BN-P vs. BN-NP).<br><br>Null effects:<br>Lived in a foster/group home (current BN-P vs. BN-NP). |
| [79]                                                       | Baseline | 2907 |      | 10 <sup>th</sup> - 11 <sup>th</sup> graders attending high schools in Edirne, Turkey |  | Interview: SCID for DSM-III-R            | Turkey |       | 54 | Cross-sectional | Current: 0.03% AN, 0.79% BN, 1.51% EDNOS, 1.00% BED                                                                                                    | Physical abuse, sexual abuse    | Effects:<br>Physical abuse victim (current EDs).<br><br>Null effects:<br>Sexual abuse (current EDs).                                     |
| Mental Health Supplement to the Ontario Health Survey [84] | Baseline | 9953 | 76   | Adults residing in households in Ontario                                             |  | Interview: CIDI for DSM-III-R            | Canada | 15-64 |    | Cross-sectional | Lifetime (males): 0.16% AN, 0.76% partial AN, 0.13% BN, 0.95% partial BN<br>Lifetime (females): 0.66% AN, 1.15% partial AN, 1.46% BN, 1.70% partial BN | Sexual abuse (within males)     | Effects:<br>n/a<br><br>Null effects:<br>Sexual abuse (males: lifetime EDs).                                                              |

Table S3: Genetic correlates of eating disorder epidemiology

| Study | Wave | N | RR (%) | Population | Year Recruited | ED Diagnosis | Country | Age Range | % Female | Design | Prevalence | Correlates | Findings |
|-------|------|---|--------|------------|----------------|--------------|---------|-----------|----------|--------|------------|------------|----------|
|-------|------|---|--------|------------|----------------|--------------|---------|-----------|----------|--------|------------|------------|----------|

|                                         |                   |          |      |                                                                                                                                                                                                                                                                           |        |                                                   |         |                     |      |                 |                                                                                                                             |               |                                                                                                                                                                                   |
|-----------------------------------------|-------------------|----------|------|---------------------------------------------------------------------------------------------------------------------------------------------------------------------------------------------------------------------------------------------------------------------------|--------|---------------------------------------------------|---------|---------------------|------|-----------------|-----------------------------------------------------------------------------------------------------------------------------|---------------|-----------------------------------------------------------------------------------------------------------------------------------------------------------------------------------|
| European Youth Heart Study (EYHS) [137] | 10-year follow-up | 484      | 88.2 | Female participants in the EYHS cohorts, originally recruited as children in Estonia in 1998-9.                                                                                                                                                                           | 2007-9 | Questionnaire: included questions for DSM-IV EDs  | Estonia | M = 21.6 (SD = 3.5) | 100  | Cross-sectional | Current: 1.65% BN-P, 2.07% BED, 2.48% sub-threshold BN, 0.83% AN-R, 1.03% sub-threshold AN, 4.34% EDNOS, 0% BN-NP, 0% AN-BP | 5-HTTLPR gene | Effects:<br>5-HTTLPR gene associated with higher state anxiety and bulimia (current BN, BED, sub-threshold BN).<br><br>Null effects:<br>5-HTTLPR gene AN, EDNOS, sub-threshold AN |
| [138]                                   | Baseline          | 202 (AN) |      | AN women (and their immediate family), who responded to advertisements on college campuses, in newspapers, and the internet; control women (and their immediate family) recruited by word of mouth or who responded to advertisements on university campus notice boards. |        | Interview: SCID for DSM-IV                        |         |                     | 100  | Cross-sectional | N/A                                                                                                                         | DRD4 gene     | Effects:<br>DRD4 gene (lifetime AN, AN-BP).<br><br>Null effects:<br>DRD4 gene (lifetime AN-R)                                                                                     |
| [139]                                   | Baseline          | 166      |      | 25-45 year-olds with BED (and normal weight and obese controls) who responded to advertisements at universities, hospitals, public institutions, and in newspapers.                                                                                                       |        | Interview: EDE for DSM-IV                         | Canada  |                     | 81.3 | Cross-sectional | N/A                                                                                                                         | DRD2 gene     | Effects:<br>DRD2 gene associated with greater reward sensitivity (current BED vs. normal weight controls).<br><br>Null effects:<br>DRD2 (current BED vs. obese controls).         |
| Virginia Twin Registry (VTR) [140-143]  | Wave 1            | 2163     | 92   | Female twins on the population-based VTR, born between 1934-71, in Virginia, USA                                                                                                                                                                                          | 1987-9 | Interview: SCID for DSM-III-R                     | USA     | 17-55               | 100  | Cross-sectional | Lifetime: 4.3% broad BN                                                                                                     | Heritability  | Estimated heritability of broad BN = 52%<br>Estimated heritability of narrow BN = 55%<br>Estimated heritability of broad AN = 58%                                                 |
|                                         | Wave 3            |          |      |                                                                                                                                                                                                                                                                           | 1992-5 |                                                   |         | 22-59               |      | Cross-sectional | Lifetime: 5.6% broad BN                                                                                                     |               | Estimated heritability of broad BN = 60%                                                                                                                                          |
|                                         | Wave 4            | 1024     |      |                                                                                                                                                                                                                                                                           |        | Questionnaire: questions based on SCID for DSM-IV |         |                     |      | Cross-sectional | 2.64% DSM-IV BN                                                                                                             |               | Estimated heritability of DSM-IV BN = 62%                                                                                                                                         |

|                                                                |                  |       |      |                                                                                                                                                 |        |                                                                                               |           |       |            |                 |                                         |                                  |                                                                                                                             |
|----------------------------------------------------------------|------------------|-------|------|-------------------------------------------------------------------------------------------------------------------------------------------------|--------|-----------------------------------------------------------------------------------------------|-----------|-------|------------|-----------------|-----------------------------------------|----------------------------------|-----------------------------------------------------------------------------------------------------------------------------|
| [144]                                                          | Baseline         | 1188  |      | Overweight and obese adults with BED from Boston; age and sex matched overweight and obese controls from Boston; first-degree relatives         | 2002-4 | Interview: SCID for DSM-IV BED                                                                | USA       | 18-91 | 75.7 (BED) | Cross-sectional | N/A                                     | Heritability                     | Estimated heritability of BED = 57%                                                                                         |
| Minnesota Twin Family Study (MTFS) [145]                       | Follow-up        | 672   |      | Reared together female twins from the MTFS                                                                                                      |        | Interview: Eating Disorders Structured Clinical Interview (EDSCI) for DSM-III-R and DSM-IV AN | USA       | 16-18 | 100        | Cross-sectional | Current: 1.9% AN, 1.9% sub-threshold AN | Heritability                     | Estimated heritability of AN/sub-threshold AN = 76%                                                                         |
| Danish Twin Register [146]                                     | Follow-up        | 29424 | 86.2 | Young Danish twins born 1953-82                                                                                                                 | 1994   | Questionnaire: self-reported and other-reported AN and BN                                     | Denmark   | 11-41 |            | Cross-sectional | Lifetime: 4.32% AN/BN                   | Heritability (female twins only) | Estimated heritability of narrow AN = 48%<br>Estimated heritability of broad AN = 52%<br>Estimated heritability of BN = 61% |
| Norwegian Institute of Public Health Twin Panel (NIPHTP) [147] | Follow-up        | 1430  |      | Female twins on the NIPHTP                                                                                                                      | 1999   | Interview: CIDI for DSM-IV and ICD-10                                                         | Norway    | 19-36 | 100        | Cross-sectional | Lifetime: 1.9% AN                       | Heritability                     | Estimated heritability of AN = 22%                                                                                          |
| Australian NHMRC Twin Registry (ATR) [148]                     | 6-year follow-up | 325   |      | Female twins on the ATR who were aged 30-45 years at baseline and either 1.) had possible lifetime history of BN; or 2.) were randomly selected | 1994-5 | Interview: EDE                                                                                | Australia |       | 100        | Cross-sectional | N/A                                     | Heritability                     | Estimated heritability of BN = 62%                                                                                          |

|       |          |    |                                                                                                    |                                                                                   |     |                                                             |     |                 |     |                                                            |                                                                                                                                                                                                                                                                                                                                                                                                                                                                            |
|-------|----------|----|----------------------------------------------------------------------------------------------------|-----------------------------------------------------------------------------------|-----|-------------------------------------------------------------|-----|-----------------|-----|------------------------------------------------------------|----------------------------------------------------------------------------------------------------------------------------------------------------------------------------------------------------------------------------------------------------------------------------------------------------------------------------------------------------------------------------------------------------------------------------------------------------------------------------|
| [149] | Baseline | 63 | Women with and without BED who responded to newspaper advertisements and flyers in medical centres | Interview: SCID for DSM-IV Questionnaire: Binge Eating Scale (BES) for DSM-IV BED | USA | BED: M = 39.5 (SD = 10.5)<br>Controls : M = 38.1 (SD = 9.5) | 100 | Cross-sectional | N/A | Psychiatric morbidity in first-degree biological relatives | Effects:<br>BED relatives have greater prevalence of lifetime: AN, BED, any ED, any depressive disorder, bipolar disorder, social phobia, specific phobia, obsessive compulsive disorder, agoraphobia, panic disorder, generalised anxiety disorder, and any anxiety disorder.<br><br>Null effects:<br>BED relatives lifetime prevalence: BN, EDNOS, major depressive disorder, dysthymic disorder, post-traumatic stress disorder, or any of the substance use disorders. |
|-------|----------|----|----------------------------------------------------------------------------------------------------|-----------------------------------------------------------------------------------|-----|-------------------------------------------------------------|-----|-----------------|-----|------------------------------------------------------------|----------------------------------------------------------------------------------------------------------------------------------------------------------------------------------------------------------------------------------------------------------------------------------------------------------------------------------------------------------------------------------------------------------------------------------------------------------------------------|

## References

1. Alegria, M., et al., *Prevalence and correlates of eating disorders in Latinos in the United States*. International Journal of Eating Disorders, 2007. **40**(7 SUPPL.): p. S15-S21.
2. Cochran, S.D., et al., *Mental Health and Substance Use Disorders Among Latino and Asian American Lesbian, Gay, and Bisexual Adults*. Journal of Consulting and Clinical Psychology, 2007. **75**(5): p. 785-794.
3. Nicdao, E.G., S. Hong, and D.T. Takeuchi, *Prevalence and correlates of eating disorders among Asian Americans: Results from the National Latino and Asian American Study*. International Journal of Eating Disorders, 2007. **40**(7 SUPPL.): p. S22-S26.
4. Allen, K.L., et al., *Risk Factors for Full- and Partial-Syndrome Early Adolescent Eating Disorders: A Population-Based Pregnancy Cohort Study*. Journal of the American Academy of Child and Adolescent Psychiatry, 2009. **48**(8): p. 800-809.
5. Beato-Fernández, L., et al., *Risk factors for eating disorders in adolescents: A Spanish community-based longitudinal study*. European Child and Adolescent Psychiatry, 2004. **13**(5): p. 287-294.
6. Bijl, R.V., et al., *Gender and age-specific first incidence of DSM-III-R psychiatric disorders in the general population. Results from the Netherlands mental health survey and incidence study (NEMESIS)*. Social Psychiatry and Psychiatric Epidemiology, 2002. **37**(8): p. 372-379.
7. Bijl, R.V., A. Ravelli, and G. Van Zessen, *Prevalence of psychiatric disorder in the general population: Results of the Netherlands Mental Health Survey and Incidence Study (NEMESIS)*. Social Psychiatry and Psychiatric Epidemiology, 1998. **33**(12): p. 587-595.
8. Bulik, C.M., et al., *Prevalence, heritability, and prospective risk factors for anorexia nervosa*. Archives of General Psychiatry, 2006. **63**(3): p. 305-312.
9. Cachelin, F.M., et al., *Acculturation and eating disorders in a Mexican American community sample*. Psychology of Women Quarterly, 2006. **30**(4): p. 340-347.
10. Cachelin, F.M., et al., *Disordered eating, acculturation, and treatment-seeking in a community sample of Hispanic, Asian, Black and White, women*. Psychology of Women Quarterly, 2000. **24**(3): p. 244-253.

11. Canals, J., et al., *Prevalence of DSM-III-R and ICD-10 psychiatric disorders in a Spanish population of 18-year-olds*. Acta Psychiatrica Scandinavica, 1997. **96**(4): p. 287-294.
12. Canals, J., C. Sancho, and M.V. Arija, *Influence of parent's eating attitudes on eating disorders in school adolescents*. European Child and Adolescent Psychiatry, 2009. **18**(6): p. 353-359.
13. Chen, H. and T. Jackson, *Prevalence and sociodemographic correlates of eating disorder endorsements among adolescents and young adults from China*. European Eating Disorders Review, 2008. **16**(5): p. 375-385.
14. Fairburn, C.G., et al., *Identifying dieters who will develop an eating disorder: A prospective, population-based study*. American Journal of Psychiatry, 2005. **162**(12): p. 2249-2255.
15. Favaro, A., S. Ferrara, and P. Santonastaso, *The spectrum of eating disorders in young women: A prevalence study in a general population sample*. Psychosomatic Medicine, 2003. **65**(4): p. 701-708.
16. Feldman, M.B. and H.H. Meyer, *Eating disorders in diverse lesbian, gay, and bisexual populations*. International Journal of Eating Disorders, 2007. **40**(3): p. 218-226.
17. Fernández, M.A.P., F.J. Labrador, and R.M. Raich, *Prevalence of eating disorders among adolescent and young adult scholastic population in the region of Madrid (Spain)*. Journal of Psychosomatic Research, 2007. **62**(6): p. 681-690.
18. Fichter, M.M., et al., *Time trends in eating disturbances in young Greek migrants*. International Journal of Eating Disorders, 2005. **38**(4): p. 310-322.
19. Frisell, T., et al., *Psychiatric morbidity associated with same-sex sexual behaviour: Influence of minority stress and familial factors*. Psychological Medicine, 2010. **40**(2): p. 315-324.
20. Garfinkel, P.E., et al., *Bulimia nervosa in a Canadian community sample: Prevalence and comparison of subgroups*. American Journal of Psychiatry, 1995. **152**(7): p. 1052-1058.
21. Garfinkel, P.E., et al., *Purging and nonpurging forms of bulimia nervosa in a community sample*. International Journal of Eating Disorders, 1996. **20**(3): p. 231-238.
22. Garrusi, B. and M.R. Baneshi, *Eating disorders and their associated risk factors among Iranian population - a community based study*. Global journal of health science, 2013. **5**(1): p. 193-202.
23. Ghaderi, A. and B. Scott, *Prevalence and psychological correlates of eating disorders among females aged 18-30 years in the general population*. Acta Psychiatrica Scandinavica, 1999. **99**(4): p. 261-266.
24. Gotestam, K.G. and W.S. Agras, *General population-based epidemiological study of eating disorders in Norway*. International Journal of Eating Disorders, 1995. **18**(2): p. 119-126.
25. Gowen, L.K., et al., *Acculturation and eating disorder symptoms in adolescent girls*. Journal of Research on Adolescence, 1999. **9**(1): p. 67-83.
26. Grucza, R.A., T.R. Przybeck, and C.R. Cloninger, *Prevalence and correlates of binge eating disorder in a community sample*. Comprehensive Psychiatry, 2007. **48**(2): p. 124-131.

27. Hay, P., *The epidemiology of eating disorder behaviors: An Australian community-based survey*. International Journal of Eating Disorders, 1998. **23**(4): p. 371-382.
28. Hudson, J.I., et al., *The Prevalence and Correlates of Eating Disorders in the National Comorbidity Survey Replication*. Biological Psychiatry, 2007. **61**(3): p. 348-358.
29. Le Grange, D., et al., *Eating disorder not otherwise specified presentation in the US population*. International Journal of Eating Disorders, 2012. **45**(5): p. 711-718.
30. Isomaa, A.L., et al., *Obesity and eating disturbances are common in 15-year-old adolescents. A two-step interview study*. Nordic Journal of Psychiatry, 2010. **64**(2): p. 123-129.
31. Isomaa, R., et al., *The prevalence, incidence and development of eating disorders in Finnish adolescents - A two-step 3-year follow-up study*. European Eating Disorders Review, 2009. **17**(3): p. 199-207.
32. Kaltiala-Heino, R., et al., *Early puberty is associated with mental health problems in middle adolescence*. Social Science and Medicine, 2003. **57**(6): p. 1055-1064.
33. Kaltiala-Heino, R., et al., *Early puberty and early sexual activity are associated with bulimic-type eating pathology in middle adolescence*. Journal of Adolescent Health, 2001. **28**(4): p. 346-352.
34. Kaltiala-Heino, R., et al., *Bulimia and bulimic behaviour in middle adolescence: More common than thought*. Acta Psychiatrica Scandinavica, 1999. **100**(1): p. 33-39.
35. Kessler, R.C., et al., *Prevalence, persistence, and sociodemographic correlates of DSM-IV disorders in the National Comorbidity Survey Replication Adolescent Supplement*. Archives of General Psychiatry, 2012. **69**(4): p. 372-380.
36. Swanson, S.A., et al., *Prevalence and correlates of eating disorders in adolescents: Results from the national comorbidity survey replication adolescent supplement*. Archives of General Psychiatry, 2011. **68**(7): p. 714-723.
37. Kessler, R.C., et al., *The prevalence and correlates of binge eating disorder in the World Health Organization World Mental Health Surveys*. Biological Psychiatry, 2013. **73**(9): p. 904-914.
38. Kinzl, J.F., et al., *Binge eating disorder in females: A population-based investigation*. International Journal of Eating Disorders, 1999. **25**(3): p. 287-292.
39. Kjelsås, E., C. Bjørnstrøm, and K.G. Gøtestam, *Prevalence of eating disorders in female and male adolescents (14-15 years)*. Eating Behaviors, 2004. **5**(1): p. 13-25.
40. Klingenspor, B., *Gender identity and bulimic eating behavior*. Sex Roles, 1994. **31**(7-8): p. 407-431.
41. Krizba, T., *An epidemiological study of eating disorders among high school students in Romania*. Journal of Cognitive and Behavioral Psychotherapies, 2010. **10**(1): p. 77-86.
42. Lachenmeyer, J.R. and P. Muni-Brander, *Eating disorders in a nonclinical adolescent population: implications for treatment*. Adolescence, 1988. **23**(90): p. 303-312.
43. Lahortiga-Ramos, F., et al., *Incidence of eating disorders in Navarra (Spain)*. European Psychiatry, 2005. **20**(2): p. 179-185.



44. Ledoux, S., M. Choquet, and M. Flament, *Eating disorders among adolescents in an unselected French population*. International Journal of Eating Disorders, 1991. **10**(1): p. 81-89.
45. Lewinsohn, P.M., et al., *Adolescent Psychopathology: I. Prevalence and Incidence of Depression and Other DSM-III-R Disorders in High School Students*. Journal of Abnormal Psychology, 1993. **102**(1): p. 133-144.
46. Lydecker, J.A., et al., *Association between co-twin sex and eating disorders in opposite sex twin pairs: Evaluations in North American, Norwegian, and Swedish samples*. Journal of Psychosomatic Research, 2012. **72**(1): p. 73-77.
47. Maceyko, S.J. and D.B. Nagelberg, *The assessment of bulimia in high school students*. The Journal of school health, 1985. **55**(4): p. 135-137.
48. Marques, L., et al., *Comparative prevalence, correlates of impairment, and service utilization for eating disorders across US ethnic groups: Implications for reducing ethnic disparities in health care access for eating disorders*. International Journal of Eating Disorders, 2011. **44**(5): p. 412-420.
49. Martínez-González, M.A., et al., *Parental factors, mass media influences, and the onset of eating disorders in a prospective population-based cohort*. Pediatrics, 2003. **111**(2): p. 315-320.
50. Mitchison, D., et al., *Self-reported history of anorexia nervosa and current quality of life: Findings from a community-based study*. Quality of Life Research, 2013. **22**(2): p. 273-281.
51. Moorhead, D.J., et al., *Child and adolescent predictors for eating disorders in a community population of young adult women*. International Journal of Eating Disorders, 2003. **33**(1): p. 1-9.
52. Mousa, T.Y., et al., *Eating disturbances among adolescent schoolgirls in Jordan*. Appetite, 2010. **54**(1): p. 196-201.
53. Mumford, D.B. and A.M. Whitehouse, *Increased prevalence of bulimia nervosa among Asian schoolgirls*. British Medical Journal, 1988. **297**(6650): p. 718.
54. Nicholls, D.E. and R.M. Viner, *Childhood Risk Factors for Lifetime Anorexia Nervosa by Age 30 Years in a National Birth Cohort*. Journal of the American Academy of Child and Adolescent Psychiatry, 2009. **48**(8): p. 791-799.
55. Nobakht, M. and M. Dezhkam, *An epidemiological study of eating disorders in Iran*. International Journal of Eating Disorders, 2000. **28**(3): p. 265-271.
56. Oakley Browne, M.A., et al., *Lifetime prevalence and projected lifetime risk of DSM-IV disorders in Te Rau Hinengaro: The New Zealand Mental Health Survey*. Australian and New Zealand Journal of Psychiatry, 2006. **40**(10): p. 865-874.
57. Wells, J.E., et al., *Prevalence, interference with life and severity of 12 month DSM-IV disorders in Te Rau Hinengaro: The New Zealand Mental Health Survey*. Australian and New Zealand Journal of Psychiatry, 2006. **40**(10): p. 845-854.
58. Patton, G.C., et al., *Onset of adolescent eating disorders: Population based cohort study over 3 years*. British Medical Journal, 1999. **318**(7186): p. 765-768.
59. Pope Jr, H.G., R.F. Champoux, and J.I. Hudson, *Eating disorder and socioeconomic class. Anorexia nervosa and bulimia in nine communities*. Journal of Nervous and Mental Disease, 1987. **175**(10): p. 620-623.

60. Preti, A., et al., *The epidemiology of eating disorders in six European countries: Results of the ESEMeD-WMH project*. Journal of Psychiatric Research, 2009. **43**(14): p. 1125-1132.
61. Roberts, R.E., C.R. Roberts, and Y. Xing, *Prevalence of youth-reported DSM-IV psychiatric disorders among African, European, and Mexican American adolescents*. Journal of the American Academy of Child and Adolescent Psychiatry, 2006. **45**(11): p. 1329-1337.
62. Roberts, R.E., C.R. Roberts, and Y. Xing, *Rates of DSM-IV psychiatric disorders among adolescents in a large metropolitan area*. Journal of Psychiatric Research, 2007. **41**(11): p. 959-967.
63. Rodríguez-Cano, T., L. Beato-Fernández, and A. Belmonte-Llario, *New contributions to the prevalence of eating disorders in Spanish adolescents: Detection of false negatives*. European Psychiatry, 2005. **20**(2): p. 173-178.
64. Rojo, L., et al., *Epidemiology and risk factors of eating disorders: A two-stage epidemiologic study in a Spanish population aged 12-18 years*. International Journal of Eating Disorders, 2003. **34**(3): p. 281-291.
65. Rosenvinge, J.H., J.S. Borgen, and R. Børresen, *The prevalence and psychological correlates of anorexia nervosa, bulimia nervosa and binge eating among 15-year-old students: A controlled epidemiological study*. European Eating Disorders Review, 1999. **7**(5): p. 382-391.
66. Sancho, C., et al., *Epidemiology of eating disorders: A two year follow up in an early adolescent school population*. European Child and Adolescent Psychiatry, 2007. **16**(8): p. 495-504.
67. Shisslak, C.M., et al., *Eating and weight control behaviors among middle school girls in relationship to body weight and ethnicity*. Journal of Adolescent Health, 2006. **38**(5): p. 631-633.
68. Taylor, *Risk factors for the onset of eating disorders in adolescent girls: Results of the McKnight longitudinal risk factor study*. American Journal of Psychiatry, 2003. **160**(2): p. 248-254.
69. Smith, D.E., et al., *Prevalence of binge eating disorder, obesity, and depression in a biracial cohort of young adults*. Annals of Behavioral Medicine, 1998. **20**(3): p. 227-232.
70. Stice, E., K. Presnell, and S.K. Bearman, *Relation of early menarche to depression, eating disorders, substance abuse, and comorbid psychopathology among adolescent girls*. Developmental Psychology, 2001. **37**(5): p. 608-619.
71. Striegel-Moore, R.H., et al., *Comparison of binge eating disorder and bulimia nervosa in a community sample*. International Journal of Eating Disorders, 2001. **29**(2): p. 157-165.
72. Striegel-Moore, R.H., et al., *Night eating syndrome in young adult women: Prevalence and correlates*. International Journal of Eating Disorders, 2005. **37**(3): p. 200-206.
73. Striegel-Moore, R.H., et al., *Eating disorders in white and black women*. American Journal of Psychiatry, 2003. **160**(7): p. 1326-1331.
74. Swanson, S.A., et al., *Change in binge eating and binge eating disorder associated with migration from Mexico to the US*. Journal of Psychiatric Research, 2012. **46**(1): p. 31-37.
75. Szumska, I., et al., *The prevalence of eating disorders and weight-control methods among young women: A Hungarian representative study*. European Eating Disorders Review, 2005. **13**(4): p. 278-284.

76. Taylor, J.Y., et al., *Prevalence of eating disorders among blacks in the National Survey of American Life*. International Journal of Eating Disorders, 2007. **40**(7 SUPPL.): p. S10-S14.
77. Taylor, R.R., L.A. Jason, and S.C. Jahn, *Chronic fatigue and sociodemographic characteristics as predictors of psychiatric disorders in a community-based sample*. Psychosomatic Medicine, 2003. **65**(5): p. 896-901.
78. Touchette, E., et al., *Subclinical eating disorders and their comorbidity with mood and anxiety disorders in adolescent girls*. Psychiatry Research, 2011. **185**(1-2): p. 185-192.
79. Vardar, E. and M. Erzen, *The prevalence of eating disorders (EDs) and comorbid psychiatric disorders in adolescents: A two-stage community-based study*. Turk Psikiyatri Dergisi, 2011. **22**(4).
80. Wade, T., et al., *Assessing the prevalence of eating disorders in an Australian twin population*. Australian and New Zealand Journal of Psychiatry, 1996. **30**(6): p. 845-851.
81. Walters, E.E. and K.S. Kendler, *Anorexia nervosa and anorexic-like syndromes in a population-based female twin sample*. American Journal of Psychiatry, 1995. **152**(1): p. 64-71.
82. Walters, E.E., et al., *Bulimia nervosa: A population-based study of purgers versus nonpurgers*. International Journal of Eating Disorders, 1993. **13**(3): p. 265-272.
83. Wittchen, H.U., C.B. Nelson, and G. Lachner, *Prevalence of mental disorders and psychosocial impairments in adolescents and young adults*. Psychological Medicine, 1998. **28**(1): p. 109-126.
84. Woodside, D.B., et al., *Comparisons of men with full or partial eating disorders, men without eating disorders, and women with eating disorders in the community*. American Journal of Psychiatry, 2001. **158**(4): p. 570-574.
85. Zachrisson, H.D., et al., *Time trends in obesity and eating disorders*. International Journal of Eating Disorders, 2008. **41**(8): p. 673-680.
86. Zhang, A.Y. and L.R. Snowden, *Ethnic characteristics of mental disorders in five U.S. communities*. Cultural Diversity and Ethnic Minority Psychology, 1999. **5**(2): p. 134-146.
87. Anderson, C. and T.A. Petrie, *Prevalence of disordered eating and pathogenic weight control behaviors among NCAA division I female collegiate gymnasts and swimmers*. Research Quarterly for Exercise and Sport, 2012. **83**(1): p. 120-124.
88. Augestad, L.B. and W.D. Flanders, *Eating disorder behavior in physically active Norwegian women*. Scandinavian Journal of Medicine and Science in Sports, 2002. **12**(4): p. 248-255.
89. Bachner-Melman, R., et al., *How anorexic-like are the symptom and personality profiles of aesthetic athletes?* Medicine and Science in Sports and Exercise, 2006. **38**(4): p. 628-636.
90. Bulik, C.M., C.A. Prescott, and K.S. Kendler, *Features of childhood sexual abuse and the development of psychiatric and substance use disorders*. British Journal of Psychiatry, 2001. **179**(NOV.): p. 444-449.
91. Danielson, K.K., et al., *Comorbidity between abuse of an adult and DSM-III-R mental disorders: Evidence from an epidemiological study*. American Journal of Psychiatry, 1998. **155**(1): p. 131-133.

92. Dansky, B.S., et al., *The national women's study: Relationship of victimization and posttraumatic stress disorder to bulimia nervosa*. International Journal of Eating Disorders, 1997. **21**(3): p. 213-228.
93. De Graaf, R., et al., *Seasonal variations in mental disorders in the general population of a country with a maritime climate: Findings from the Netherlands mental health survey and incidence study*. American Journal of Epidemiology, 2005. **162**(7): p. 654-661.
94. Fairburn, C.G., et al., *Risk factors for binge eating disorder: A community-based, case-control study*. Archives of General Psychiatry, 1998. **55**(5): p. 425-432.
95. Faravelli, C., et al., *Psychopathology after rape*. American Journal of Psychiatry, 2004. **161**(8): p. 1483-1485.
96. Feldman, M.B. and I.H. Meyer, *Childhood abuse and eating disorders in gay and bisexual men*. International Journal of Eating Disorders, 2007. **40**(5): p. 418-423.
97. Goldfield, G.S., *Body image, disordered eating and anabolic steroid use in female bodybuilders*. Eating Disorders, 2009. **17**(3): p. 200-210.
98. Goldfield, G.S., A.G. Blouin, and D.B. Woodside, *Body image, binge eating, and bulimia nervosa in male bodybuilders*. Canadian Journal of Psychiatry, 2006. **51**(3): p. 160-168.
99. Göpel, C. and F. Herrmann, *Characteristics of monozygotic twins discordant for bulimia nervosa*. International Journal of Eating Disorders, 2001. **29**(1): p. 1-10.
100. Gunter, T.D., et al., *Relative Contributions of Gender and Traumatic Life Experience to the Prediction of Mental Disorders in a Sample of Incarcerated Offenders*. Behavioral Sciences and the Law, 2012. **30**(5): p. 615-630.
101. Holderness, C.C., J. Brooks-Gunn, and M.P. Warren, *Eating disorders and substance use: A dancing vs a nondancing population*. Medicine and Science in Sports and Exercise, 1994. **26**(3): p. 297-302.
102. Hulley, A., et al., *Eating disorders in elite female distance runners: Effects of nationality and running environment*. Psychology of Sport and Exercise, 2007. **8**(4): p. 521-533.
103. Hulley, A.J. and A.J. Hill, *Eating disorders and health in elite women distance runners*. International Journal of Eating Disorders, 2001. **30**(3): p. 312-317.
104. Jacobson, I.G., et al., *Disordered eating and weight changes after deployment: Longitudinal assessment of a large US military cohort*. American Journal of Epidemiology, 2009. **169**(4): p. 415-427.
105. Johnson, J.G., et al., *Childhood adversities associated with risk for eating disorders or weight problems during adolescence or early adulthood*. American Journal of Psychiatry, 2002. **159**(3): p. 394-400.
106. Kaltiala-Heino, R., et al., *Bullying at school - An indicator of adolescents at risk for mental disorders*. Journal of Adolescence, 2000. **23**(6): p. 661-674.
107. Karlson, K.A., C.B. Becker, and A. Merkur, *Prevalence of eating disordered behavior in collegiate lightweight women rowers and distance runners*. Clinical Journal of Sport Medicine, 2001. **11**(1): p. 32-37.

108. Lauder, T.D., et al., *Abnormal eating behaviors in military women*. *Medicine and Science in Sports and Exercise*, 1999. **31**(9): p. 1265-1271.
109. Martinsen, M. and J. Sundgot-Borgen, *Higher prevalence of eating disorders among adolescent elite athletes than controls*. *Medicine and Science in Sports and Exercise*, 2013. **45**(6): p. 1188-1197.
110. McFarlane, A.C. and M. Van Hooff, *Impact of childhood exposure to a natural disaster on adult mental health: 20-Year longitudinal follow-up study*. *British Journal of Psychiatry*, 2009. **195**(2): p. 142-148.
111. McNulty, P.A.F., *Prevalence and contributing factors of eating disorder behaviors in active duty service women in the Army, Navy, Air Force, and Marines*. *Military Medicine*, 2001. **166**(1): p. 53-58.
112. Pike, K.M., et al., *Antecedent life events of binge-eating disorder*. *Psychiatry Research*, 2006. **142**(1): p. 19-29.
113. Striegel-Moore, R.H., et al., *Toward an understanding of risk factors for binge-eating disorder in black and white women: A community-based case-control study*. *Psychological Medicine*, 2005. **35**(6): p. 907-917.
114. Preti, A., et al., *Eating disorders among professional fashion models*. *Psychiatry Research*, 2008. **159**(1-2): p. 86-94.
115. Prussin, R.A. and P.D. Harvey, *Depression, dietary restraint, and binge eating in female runners*. *Addictive Behaviors*, 1991. **16**(5): p. 295-301.
116. Raevuori, A., et al., *Anorexia and bulimia nervosa in same-sex and opposite-sex twins: Lack of association with twin type in a nationwide study of Finnish twins*. *American Journal of Psychiatry*, 2008. **165**(12): p. 1604-1610.
117. Ravaldi, C., et al., *Gender role, eating disorder symptoms, and body image concern in ballet dancers*. *Journal of Psychosomatic Research*, 2006. **61**(4): p. 529-535.
118. Ravaldi, C., et al., *Eating disorders and body image disturbances among ballet dancers, gymnasium users and body builders*. *Psychopathology*, 2003. **36**(5): p. 247-254.
119. Rayworth, B.B., L.A. Wise, and B.L. Harlow, *Childhood abuse and risk of eating disorders in women*. *Epidemiology*, 2004. **15**(3): p. 271-278.
120. Rojo, L., et al., *Influence of stress in the onset of eating disorders: Data from a two-stage epidemiologic controlled study*. *Psychosomatic Medicine*, 2006. **68**(4): p. 628-635.
121. Romans, S.E., et al., *Child sexual abuse and later disordered eating: A New Zealand epidemiological study*. *International Journal of Eating Disorders*, 2001. **29**(4): p. 380-392.
122. Rosenvinge, J.H. and C. Vig, *Eating disorders and associated symptoms among adolescent swimmers. Initial screening and a controlled study*. *Scandinavian Journal of Medicine and Science in Sports*, 1993. **3**(3): p. 164-169.
123. Sanci, L., et al., *Childhood sexual abuse and eating disorders in females: Findings from the Victorian Adolescent Health Cohort study*. *Archives of Pediatrics and Adolescent Medicine*, 2008. **162**(3): p. 261-267.
124. Santonastaso, P., S. Mondini, and A. Favaro, *Are fashion models a group at risk for eating disorders and substance abuse?* *Psychotherapy and Psychosomatics*, 2002. **71**(3): p. 168-172.

125. Schoemaker, C., et al., *Bulimia nervosa following psychological and multiple child abuse: Support for the self-medication hypothesis in a population-based cohort study*. International Journal of Eating Disorders, 2002. **32**(4): p. 381-388.
126. Sundgot-Borgen, J., et al., *Sexual harassment and eating disorders in female elite athletes - A controlled study*. Scandinavian Journal of Medicine and Science in Sports, 2003. **13**(5): p. 330-335.
127. Sundgot-Borgen, J. and S. Larsen, *Pathogenic weight-control methods and self-reported eating disorders in female elite athletes and controls*. Scandinavian Journal of Medicine and Science in Sports, 1993. **3**(3): p. 150-155.
128. Sundgot-Borgen, J. and M.K. Torstveit, *Prevalence of Eating Disorders in Elite Athletes Is Higher Than in the General Population*. Clinical Journal of Sport Medicine, 2004. **14**(1): p. 25-32.
129. Svavarsdottir, E.K. and B. Orlygsdottir, *Intimate partner abuse factors associated with women's health: A general population study*. Journal of Advanced Nursing, 2009. **65**(7): p. 1452-1462.
130. Thompson, S.H., *Characteristics of the female athlete triad in collegiate cross-country runners*. Journal of American College Health, 2007. **56**(2): p. 129-136.
131. Toro, J., et al., *Eating disorders in Ballet dancing students: Problems and risk factors*. European Eating Disorders Review, 2009. **17**(1): p. 40-49.
132. Torstveit, M.K., J.H. Rosenvinge, and J. Sundgot-Borgen, *Prevalence of eating disorders and the predictive power of risk models in female elite athletes: A controlled study*. Scandinavian Journal of Medicine and Science in Sports, 2008. **18**(1): p. 108-118.
133. Walberg, J.L. and C.S. Johnston, *Menstrual function and eating behavior in female recreational weight lifters and competitive body builders*. Medicine and Science in Sports and Exercise, 1991. **23**(1): p. 30-36.
134. Welch, S.L., H.A. Doll, and C.G. Fairburn, *Life events and the onset of bulimia nervosa: A controlled study*. Psychological Medicine, 1997. **27**(3): p. 515-522.
135. Welch, S.L. and C.G. Fairburn, *Childhood sexual and physical abuse as risk factors for the development of bulimia nervosa: A community-based case control study*. Child Abuse and Neglect, 1996. **20**(7): p. 633-642.
136. Welch, S.L. and C.G. Fairburn, *Sexual abuse and bulimia nervosa: Three integrated case control comparisons*. American Journal of Psychiatry, 1994. **151**(3): p. 402-407.
137. Akkermann, K., et al., *Serotonin transporter gene promoter polymorphism affects the severity of binge eating in general population*. Progress in Neuro-Psychopharmacology and Biological Psychiatry, 2010. **34**(1): p. 111-114.
138. Bachner-Melman, R., et al., *Anorexia nervosa, perfectionism, and dopamine D4 receptor (DRD4)*. American Journal of Medical Genetics, Part B: Neuropsychiatric Genetics, 2007. **144**(6): p. 748-756.
139. Davis, C., et al., *Reward sensitivity and the D2 dopamine receptor gene: A case-control study of binge eating disorder*. Progress in Neuro-Psychopharmacology and Biological Psychiatry, 2008. **32**(3): p. 620-628.
140. Bulik, C.M., P.F. Sullivan, and K.S. Kendler, *Heritability of binge-eating and broadly defined bulimia nervosa*. Biological Psychiatry, 1998. **44**(12): p. 1210-1218.

141. Kendler, K.S., et al., *The genetic epidemiology of bulimia nervosa*. American Journal of Psychiatry, 1991. **148**(12): p. 1627-1637.
142. Mazzeo, S.E., et al., *A twin study of specific bulimia nervosa symptoms*. Psychological Medicine, 2010. **40**(7): p. 1203-1213.
143. Wade, T.D., et al., *Anorexia nervosa and major depression: Shared genetic and environmental risk factors*. American Journal of Psychiatry, 2000. **157**(3): p. 469-471.
144. Javaras, K.N., et al., *Familiality and heritability of binge eating disorder: Results of a case-control family study and a twin study*. International Journal of Eating Disorders, 2008. **41**(2): p. 174-179.
145. Klump, K.L., et al., *Genetic and environmental influences on anorexia nervosa syndromes in a population-based twin sample*. Psychological Medicine, 2001. **31**(4): p. 737-740.
146. Kortegeard, L.S., et al., *A preliminary population-based twin study of self-reported eating disorder*. Psychological Medicine, 2001. **31**(2): p. 361-365.
147. Mazzeo, S.E., et al., *Assessing the heritability of anorexia nervosa symptoms using a marginal maximal likelihood approach*. Psychological Medicine, 2009. **39**(3): p. 463-473.
148. Wade, T., et al., *A genetic analysis of the eating and attitudes associated with bulimia nervosa: Dealing with the problem of ascertainment in twin studies*. Behavior Genetics, 1999. **29**(1): p. 1-10.
149. Lilienfeld, L.R.R., et al., *A family history study of binge-eating disorder*. Comprehensive Psychiatry, 2008. **49**(3): p. 247-254.
